# Supplementary material for: Energy Landscapes and Heat Capacity Signatures for Monomers and Dimers of Amyloid-Forming Hexapeptides
Source: MDPI journal article supplement (doi:10.3390/ijms241310613), 2023-06-25
Supplement: s1 [file s1]

## Energy landscapes and heat capacity signatures for monomers and dimers of amyloid forming hexapeptides

Nicy and David J. Wales \*

Yusuf Hamied Department of Chemistry, University of Cambridge, Cambridge, CB2 1EW, UK

\* Correspondence: dw34@cam.ac.uk

(Dated: 16 June 2023)

### SUPPLEMENTARY INFORMATION

- Table [S1](#) contains the details of sequence numbers for the hexapeptides.
- Tables [S2](#), [S3](#), and [S4](#) contain the details of temperatures at which features are observed in the  $C_V$ .
- Figure [S1](#) shows correlation plots between different amyloid predictors.
- Figures [S2–S31](#) show disconnectivity graphs for all the hexapeptides.

| UniProt Identifier | Hexapeptide | Sequence |
|--------------------|-------------|----------|
| P10997 IAPP HUMAN  | NFGAIL      | 55–60    |
|                    | GAILSS      | 57–62    |
|                    | SSTNVG      | 61–66    |
| P12969 IAPP RAT    | NLGPVL      | 59–64    |
| P10636 TAU HUMAN   | VQIVYK      | 623–628  |
| P01308 INS HUMAN   | LYQLEN      | 102–107  |
|                    | YQLENY      | 103–108  |
| P61769 B2MG HUMAN  | LLYYTE      | 84–89    |
|                    | YYTEFT      | 86–91    |
|                    | EVDLLK      | 56–61    |
|                    | LSFSKD      | 74–79    |
|                    | NGERIE      | 62–67    |
| P05067 A4 HUMAN    | KLVFFA      | 687–692  |
|                    | GAIIGL      | 700–705  |
|                    | MVGGVV      | 706–711  |
|                    | GGVVIA      | 708–713  |
| P02649 APOE HUMAN  | SSQVTQ      | 71–76    |
| P04156 PRIO HUMAN  | SNQNNF      | 170–175  |
| P02743 SAMP HUMAN  | GYVIK       | 213–218  |

Table S1: Sequence numbers of hexapeptides in their respective proteins as obtained from the UniProt database.

| Hexapeptide   | Peak/Inflection(*) temperatures |           |           |           |
|---------------|---------------------------------|-----------|-----------|-----------|
|               | Feature 1                       | Feature 2 | Feature 3 | Feature 4 |
| <b>NFGAIL</b> | 0.076*                          | 0.364*    | 0.701     | -         |
| NAGAIL        | 0.167*                          | 0.524     | -         | -         |
| LIAGFN        | 0.043                           | 0.223*    | 0.392     | 0.962     |
| NLGPVL        | 0.055                           | 0.456     | -         | -         |
| <b>STVIIE</b> | 0.248                           | 0.564     | -         | -         |
| STVIIP        | 0.012                           | 0.157     | 0.390     | 0.945     |
| SPVIIE        | 0.030                           | 0.295     | -         | -         |
| STVVIE        | 0.101                           | 0.235     | 0.947     | -         |
| <b>VQIVYK</b> | 0.089                           | 0.518     | 0.891     | -         |
| VQIVEK        | 0.011                           | 0.131*    | 0.269     | 1.031     |
| NAEVYK        | 0.047                           | 0.216     | 0.898     | -         |
| <b>LYQLEN</b> | 0.079*                          | 0.227     | 0.385     | 0.802     |
| YQLENY        | 0.024                           | 0.281     | -         | -         |
| <b>LLYYTE</b> | 0.041                           | 0.178     | 0.316     | -         |
| YYTEFT        | 0.017                           | 0.242     | 0.427*    | 1.145     |

Table S2: Hexapeptides, and  $k_B T$  ( kcal mol<sup>-1</sup>) at which peaks or distinct inflection points are observed. The features are labelled as 1, 2, 3, and 4 from low temperature to high temperature.

The inflection points are marked with an asterisk (\*).

| Hexapeptide | Peak/Inflection(*) temperatures |           |           |           |
|-------------|---------------------------------|-----------|-----------|-----------|
|             | Feature 1                       | Feature 2 | Feature 3 | Feature 4 |
| GAIIGL      | 0.219*                          | 0.598     | -         | -         |
| GGVVIA      | 0.034                           | 0.377*    | 0.582     | -         |
| MVGGVV      | 0.037                           | 0.213     | 0.630     | -         |
| GAILSS      | 0.179                           | 0.310     | -         | -         |
| SSQVTQ      | 0.218                           | 0.426     | -         | -         |
| SSTNVG      | 0.054                           | 0.241     | -         | -         |
| SNQNNF      | 0.016                           | 0.199     | 0.312     | 1.011     |
| SVSSSY      | 0.039                           | 0.240     | 0.514     | -         |
| GYVIK       | 0.016                           | 0.437     | -         | -         |
| KLVFFA      | 0.150                           | 0.439     | -         | -         |
| KAFIIQ      | 0.259                           | -         | -         | -         |
| KAILFL      | 0.112                           | 0.309     | -         | -         |
| EVDLLK      | 0.021                           | 0.204*    | 0.417     | -         |
| LSFSKD      | 0.011                           | 0.101*    | 0.368     | 0.860     |
| NGERIE      | 0.155                           | 0.404     | -         | -         |

Table S3: Hexapeptides, and  $k_B T$  ( kcal mol<sup>-1</sup>) at which peaks or distinct inflection points are observed. The features are labelled as 1, 2, 3, and 4 from low temperature to high temperature.

The inflection points are marked with an asterisk (\*).



| Hexapeptide   | Peak/Inflection(*) temperatures |                           |                           |                           |
|---------------|---------------------------------|---------------------------|---------------------------|---------------------------|
|               | Feature 1                       | Feature 2                 | Feature 3                 | Feature 4                 |
| <b>NFGAIL</b> | 0.060                           | 0.432*                    | 0.859                     | -                         |
| NAGAIL        | 0.016                           | 0.107                     | 1.148                     | -                         |
| LIAGFN        | 0.167                           | 0.294*                    | 1.080                     | -                         |
| NLGPVL        | 0.100                           | 0.458 <sup><i>i</i></sup> | 1.095                     | -                         |
| <b>STVIIE</b> | 0.122                           | 0.540                     | 1.096 <sup><i>i</i></sup> | -                         |
| STVIIP        | 0.036                           | 0.547                     | 1.051                     | -                         |
| SPVIIE        | 0.023                           | 0.229                     | 0.400                     | -                         |
| STVVIE        | 0.043                           | 0.354                     | 0.667                     | -                         |
| <b>VQIVYK</b> | 0.081*                          | 0.268                     | 1.123                     | -                         |
| VQIVEK        | 0.061                           | 0.420                     | 0.891                     | -                         |
| NAEVYK        | 0.107                           | 0.718                     | -                         | -                         |
| <b>LYQLEN</b> | 0.042                           | 0.173*                    | 0.600                     | 0.888                     |
| YQLENY        | 0.271*                          | 0.408                     | -                         | -                         |
| <b>LLYYTE</b> | 0.021 <sup><i>i</i></sup>       | 0.281                     | 0.902                     | -                         |
| YYTEFT        | 0.057                           | 0.215                     | 0.418                     | 1.156 <sup><i>i</i></sup> |

Table S4: Dimers of hexapeptides, and  $k_B T$  (kcal mol<sup>-1</sup>) at which peaks or distinct inflection points are observed. The features are labelled as 1, 2, 3, and 4 from low temperature to high temperature. The inflection points are marked with an asterisk (\*) and very small peaks are marked with '*i*' (<sup>*i*</sup>).

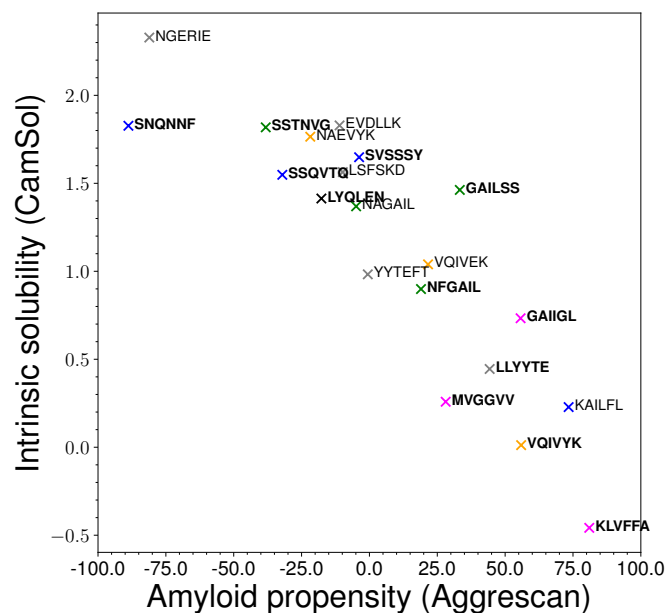

(a) Correlation plot between amyloid predictor Aggrescan and intrinsic solubility predictor CamSol.

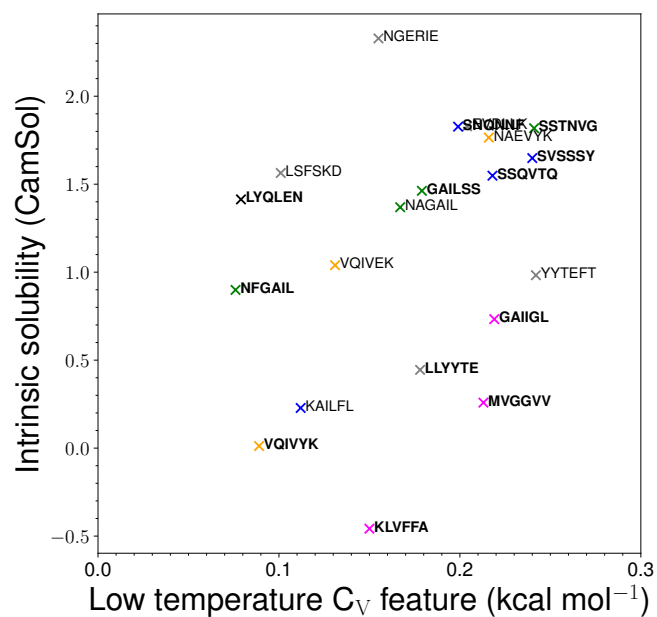

(b) Correlation plot between low temperature heat capacity feature and intrinsic solubility as predicted using CamSol.

Figure S1: Correlation plots between different amyloid predictors.

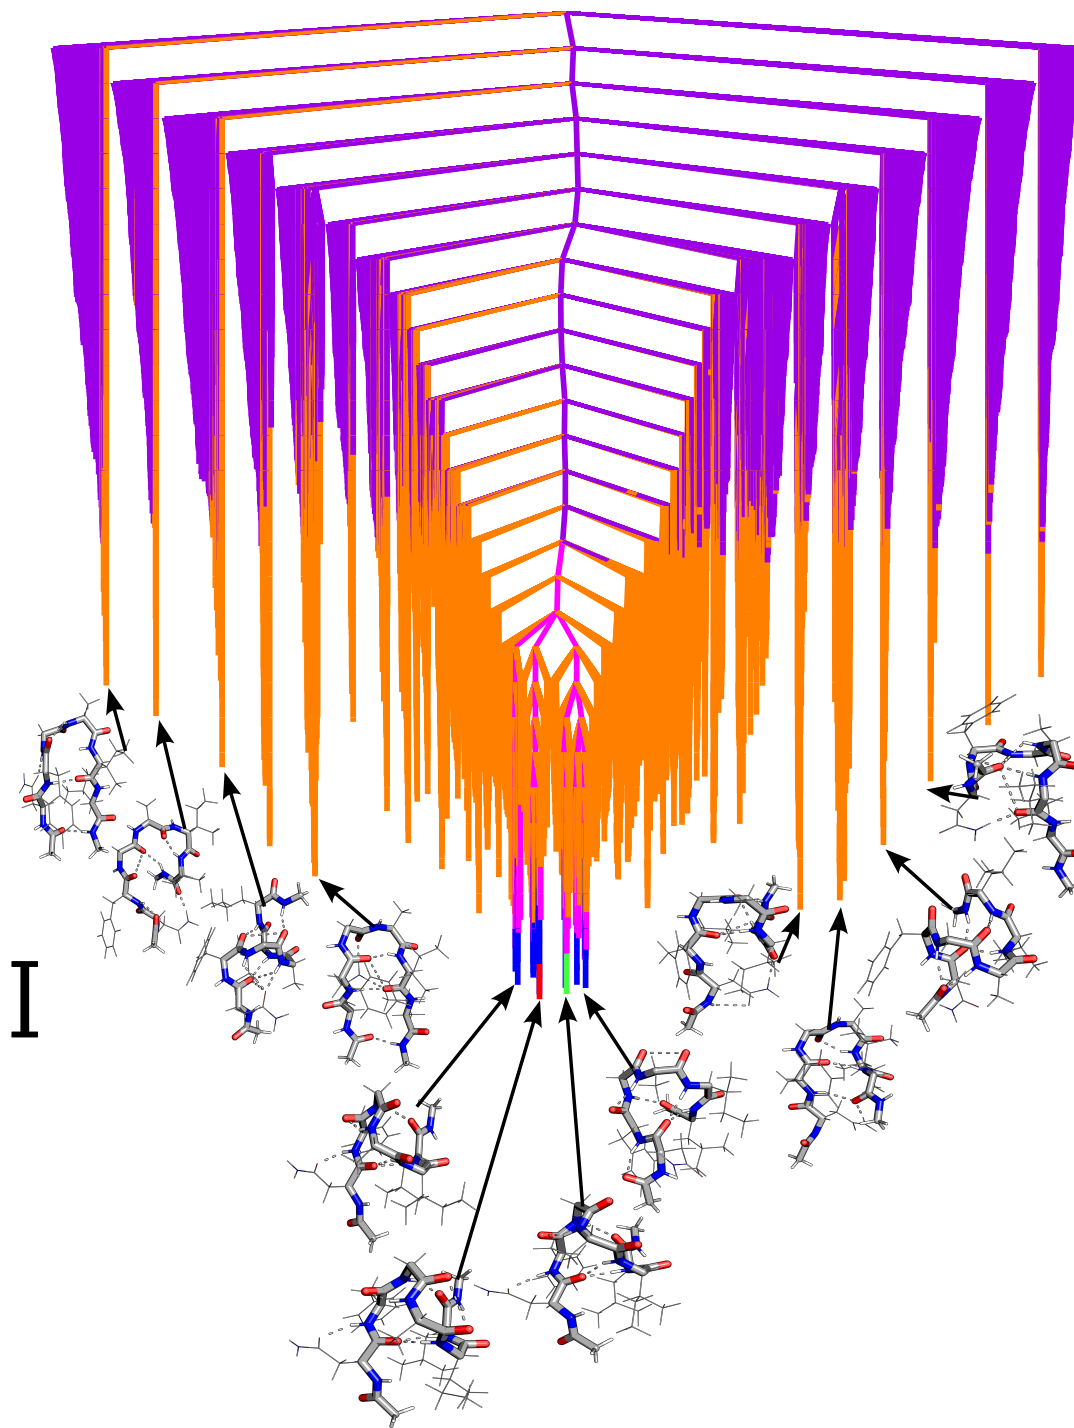

Figure S2: Disconnectivity graphs for **NFGAIL** monomer. Local minima representing transition for peaks/inflection points are represented by red to blue (peak 1), green to orange (peak 2), pink to purple (peak 3) and grey to yellow (peak 4). The scalebar represents  $1 \text{ kcal mol}^{-1}$ .

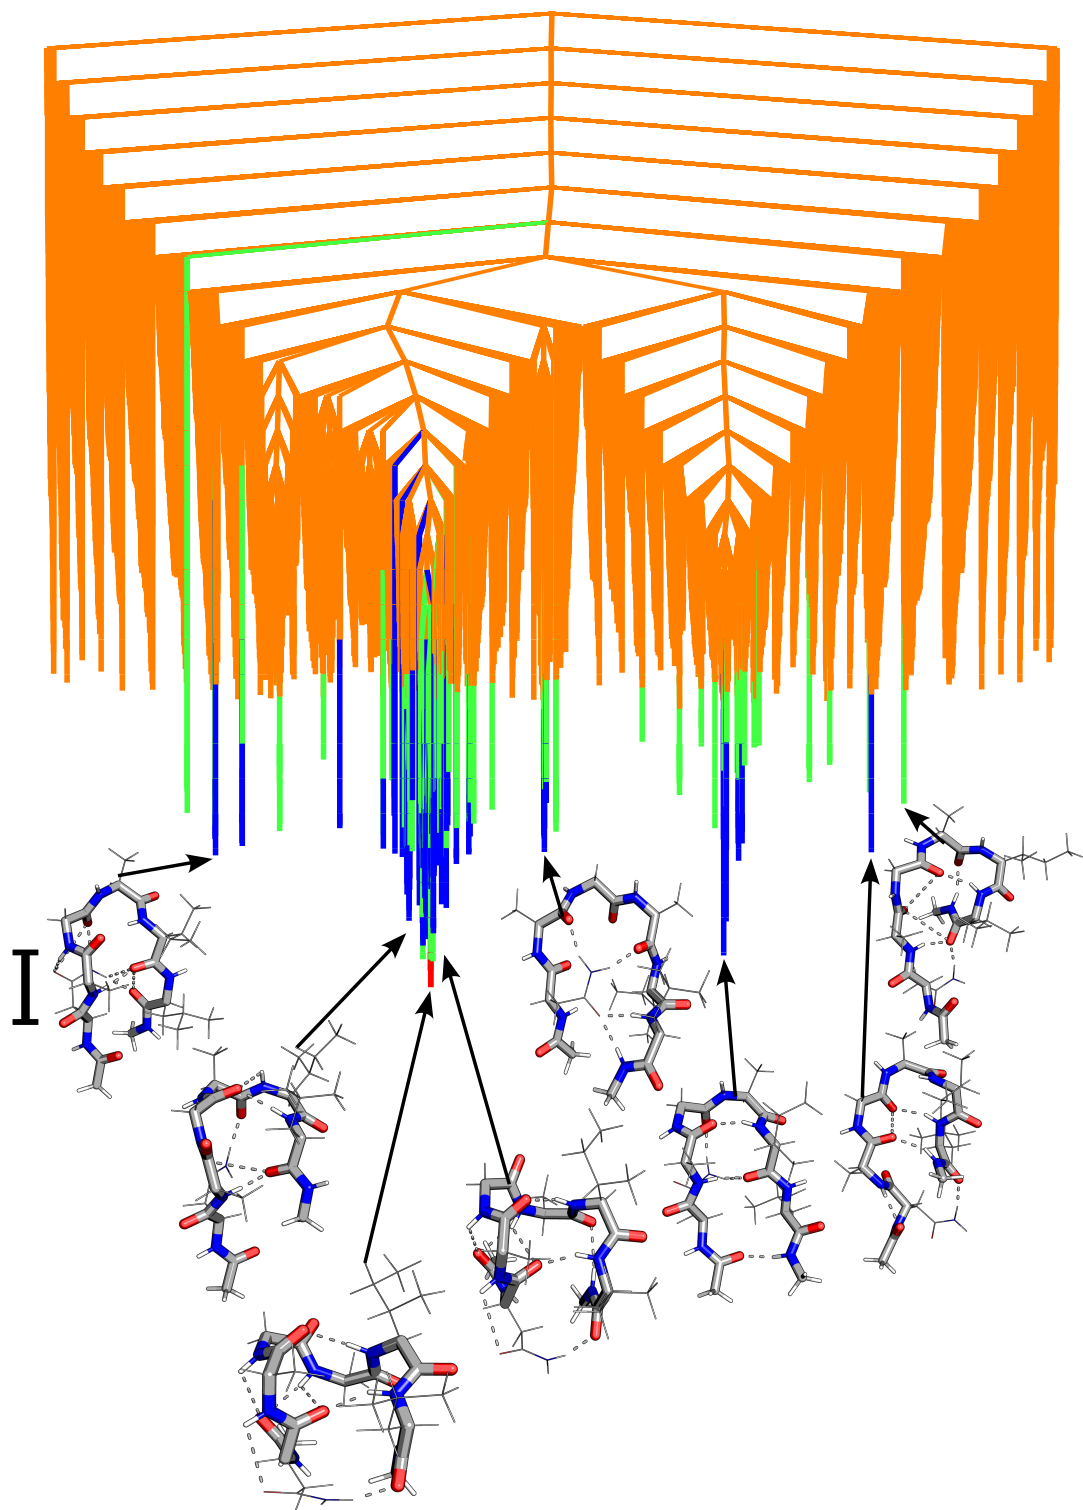

Figure S3: Disconnectivity graphs for NAGAIL monomer. Local minima representing transition for peaks/inflection points are represented by red to blue (peak 1), green to orange (peak 2), pink to purple (peak 3) and grey to yellow (peak 4). The scalebar represents  $1 \text{ kcal mol}^{-1}$ .

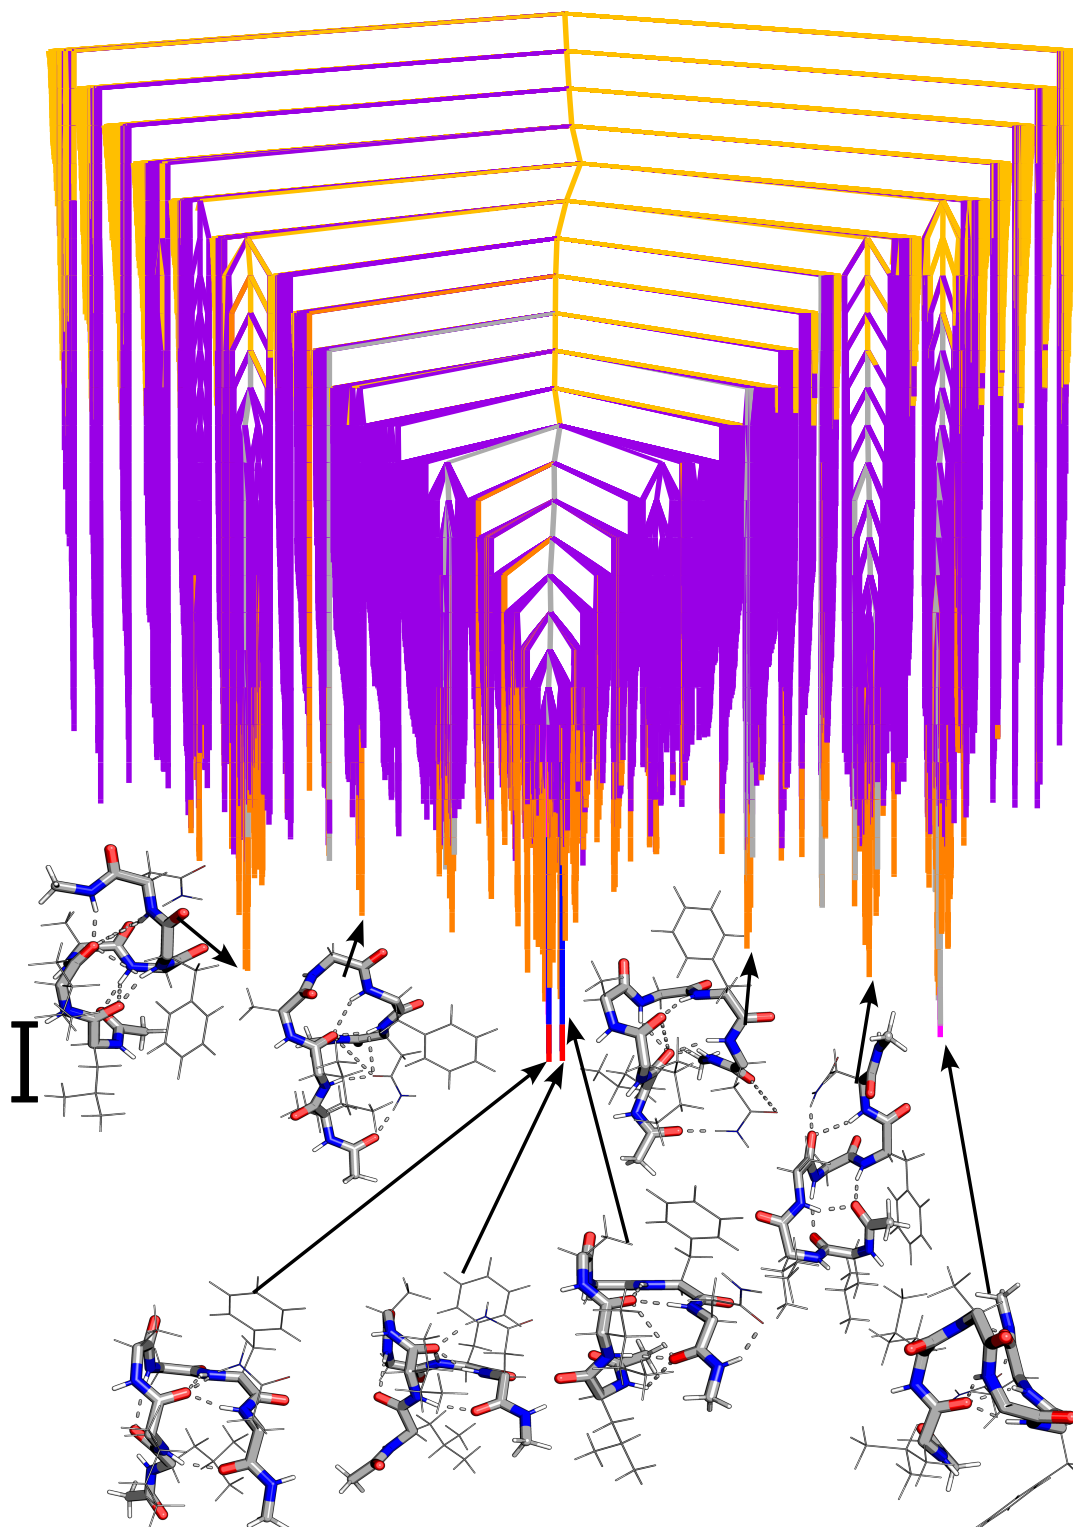

Figure S4: Disconnectivity graphs for LIAGFN monomer. Local minima representing transition for peaks/inflection points are represented by red to blue (peak 1), green to orange (peak 2), pink to purple (peak 3) and grey to yellow (peak 4). The scalebar represents  $1 \text{ kcal mol}^{-1}$ .

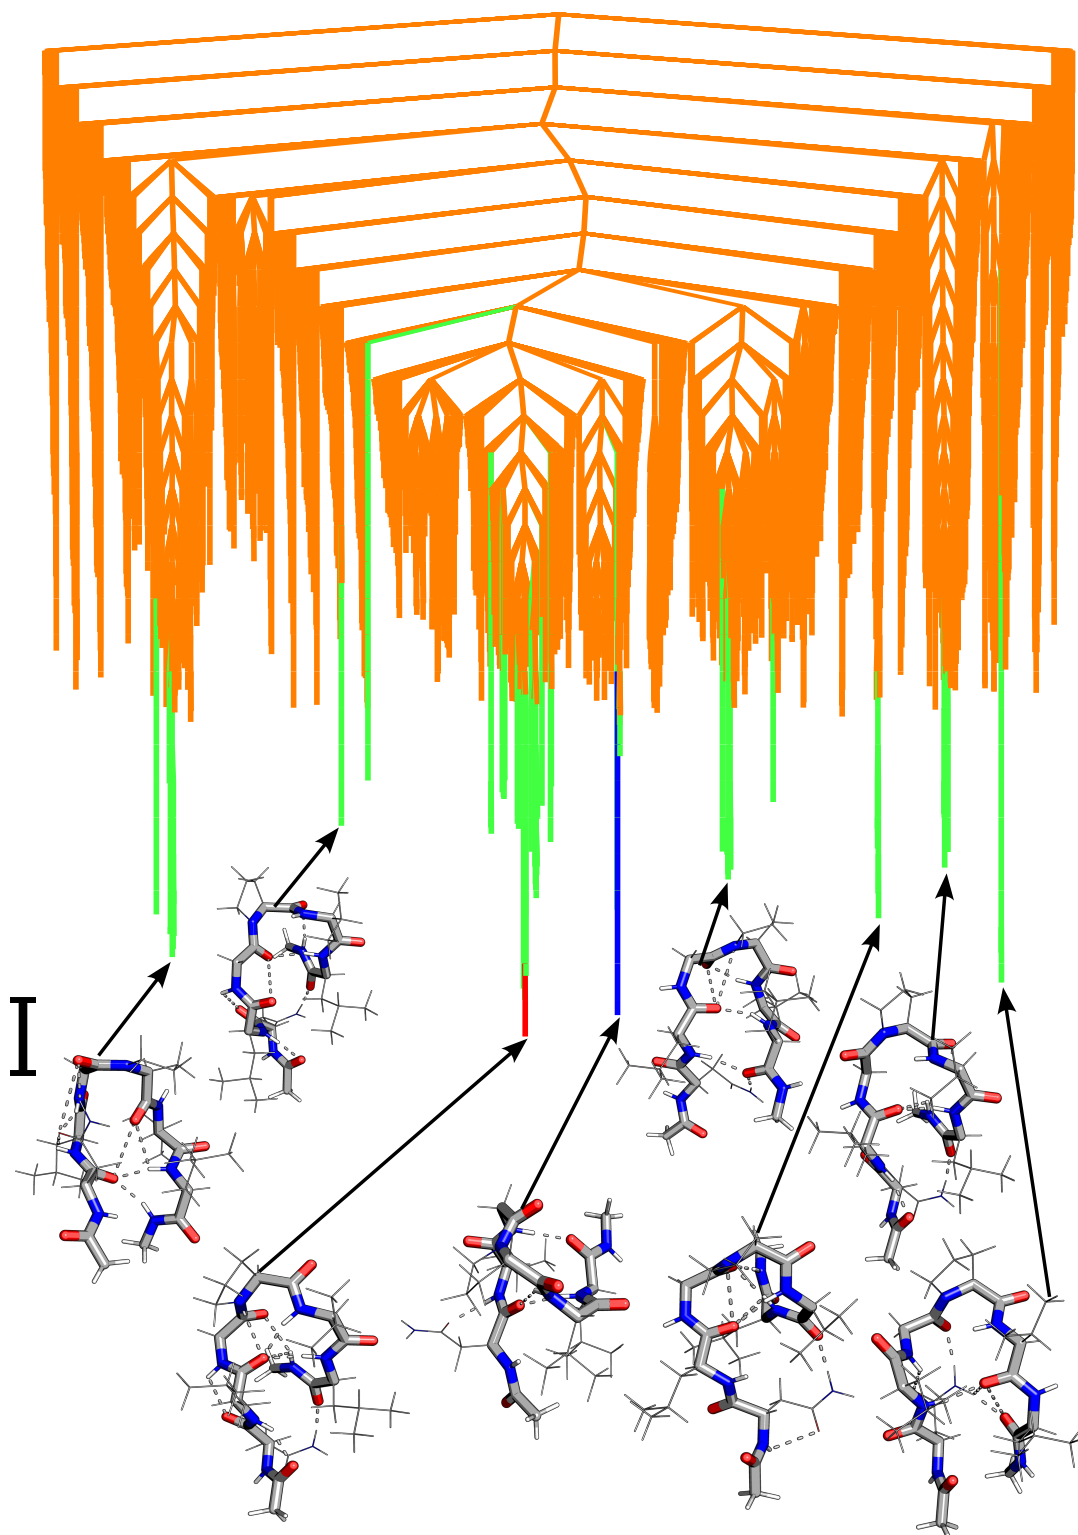

Figure S5: Disconnectivity graphs for NLGPVL monomer. Local minima representing transition for peaks/inflection points are represented by red to blue (peak 1), green to orange (peak 2), pink to purple (peak 3) and grey to yellow (peak 4). The scalebar represents 1 kcal mol<sup>-1</sup>.

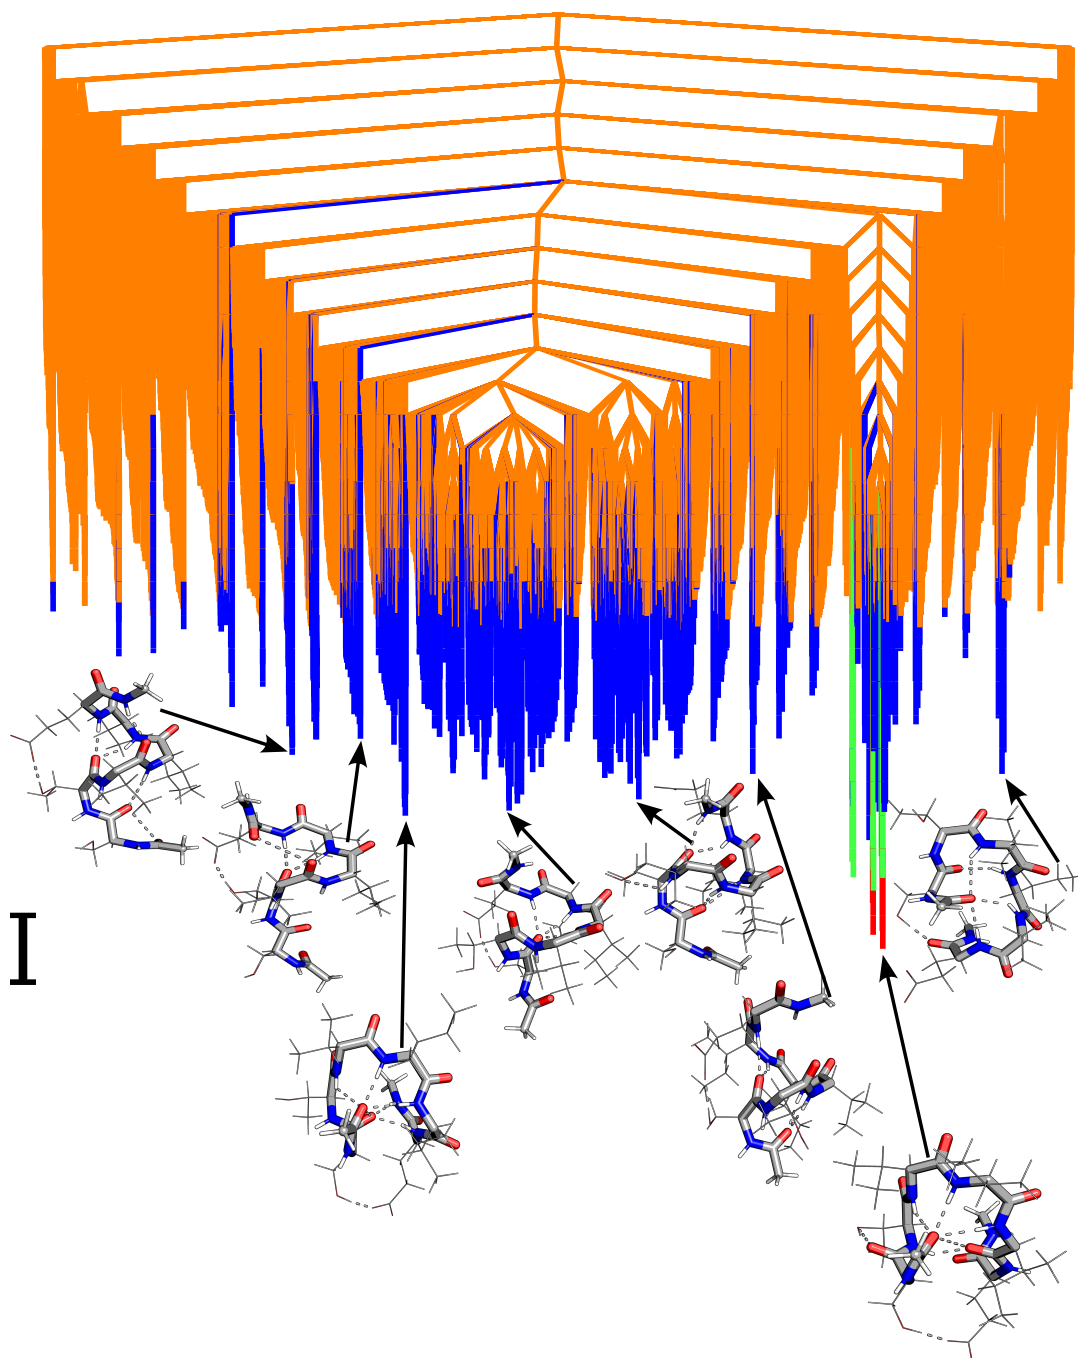

Figure S6: Disconnectivity graphs for **STVIE** monomer. Local minima representing transition for peaks/inflection points are represented by red to blue (peak 1), green to orange (peak 2), pink to purple (peak 3) and grey to yellow (peak 4). The scalebar represents 1 kcal mol<sup>-1</sup>.

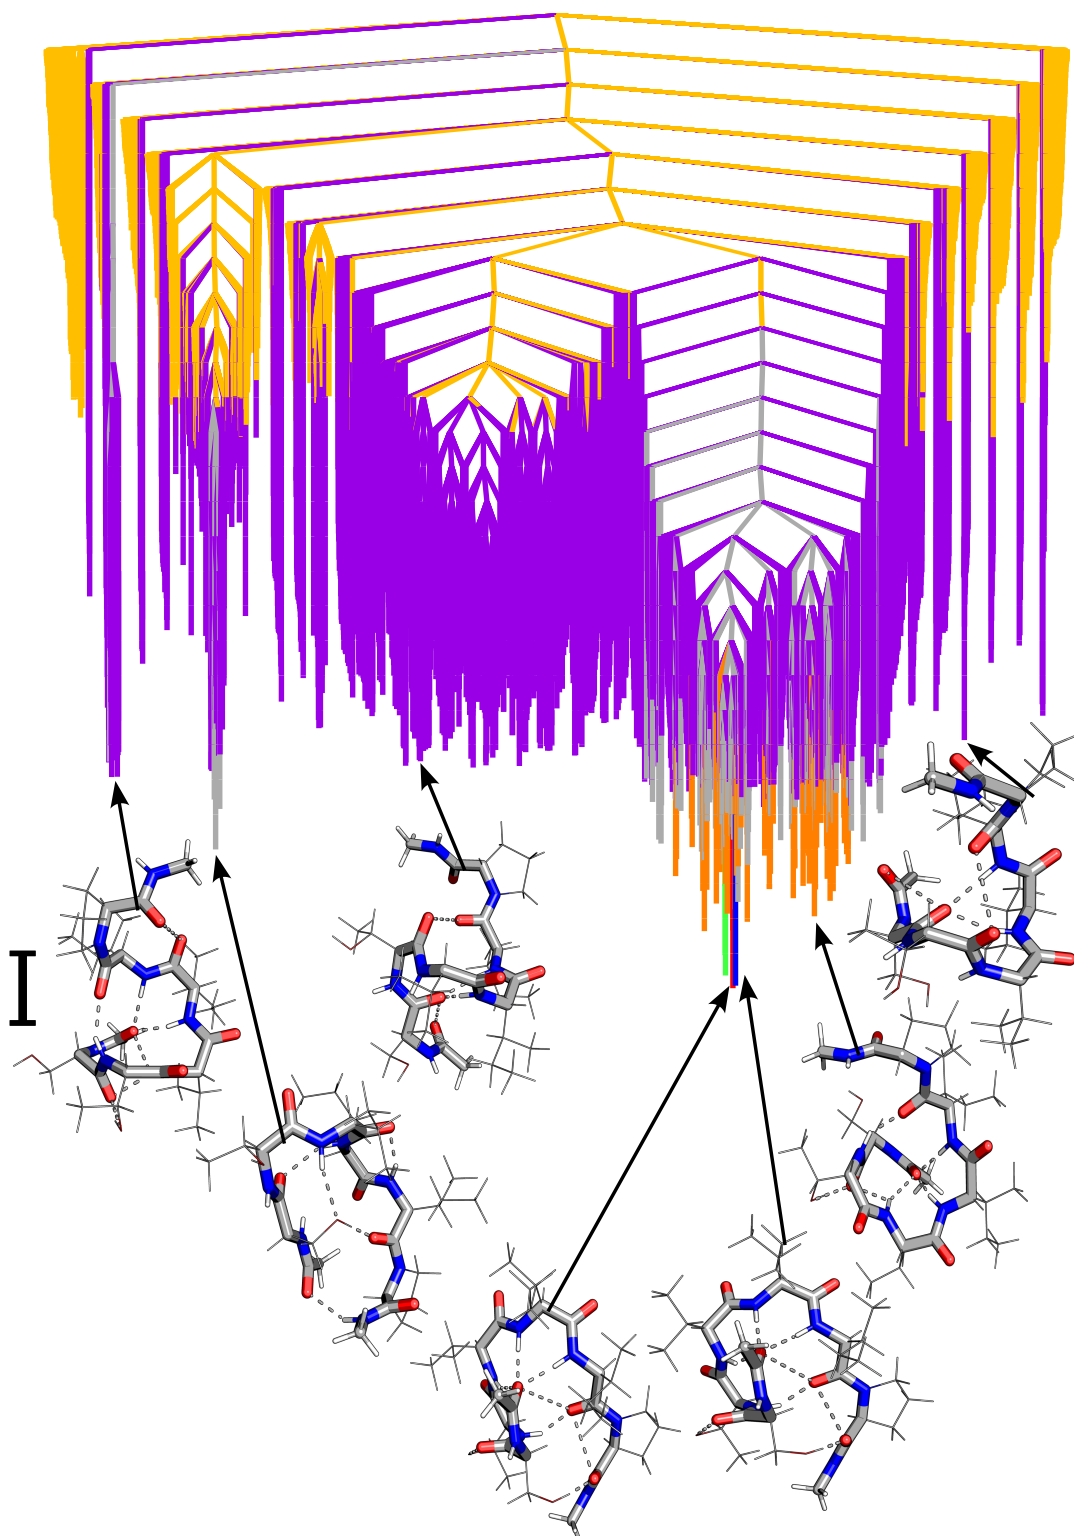

Figure S7: Disconnectivity graphs for STVIIP monomer. Local minima representing transition for peaks/inflection points are represented by red to blue (peak 1), green to orange (peak 2), pink to purple (peak 3) and grey to yellow (peak 4). The scalebar represents  $1 \text{ kcal mol}^{-1}$ .



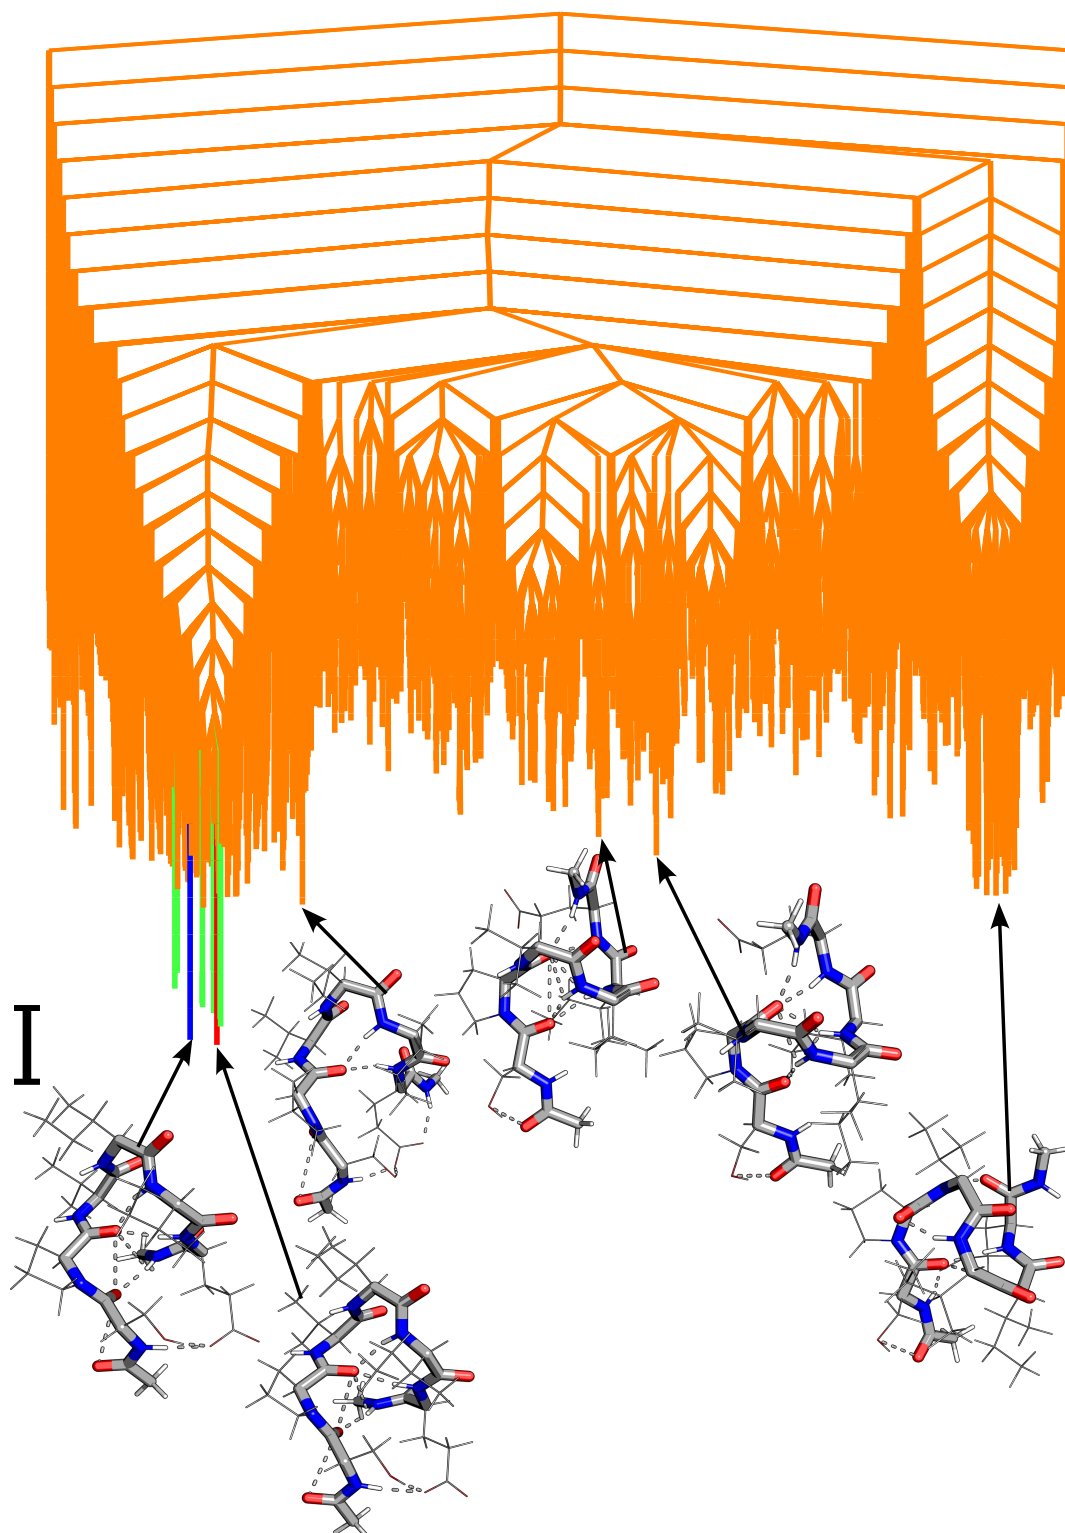

Figure S8: Disconnectivity graphs for SPVIIIE monomer. Local minima representing transition for peaks/inflection points are represented by red to blue (peak 1), green to orange (peak 2), pink to purple (peak 3) and grey to yellow (peak 4). The scalebar represents  $1 \text{ kcal mol}^{-1}$ .

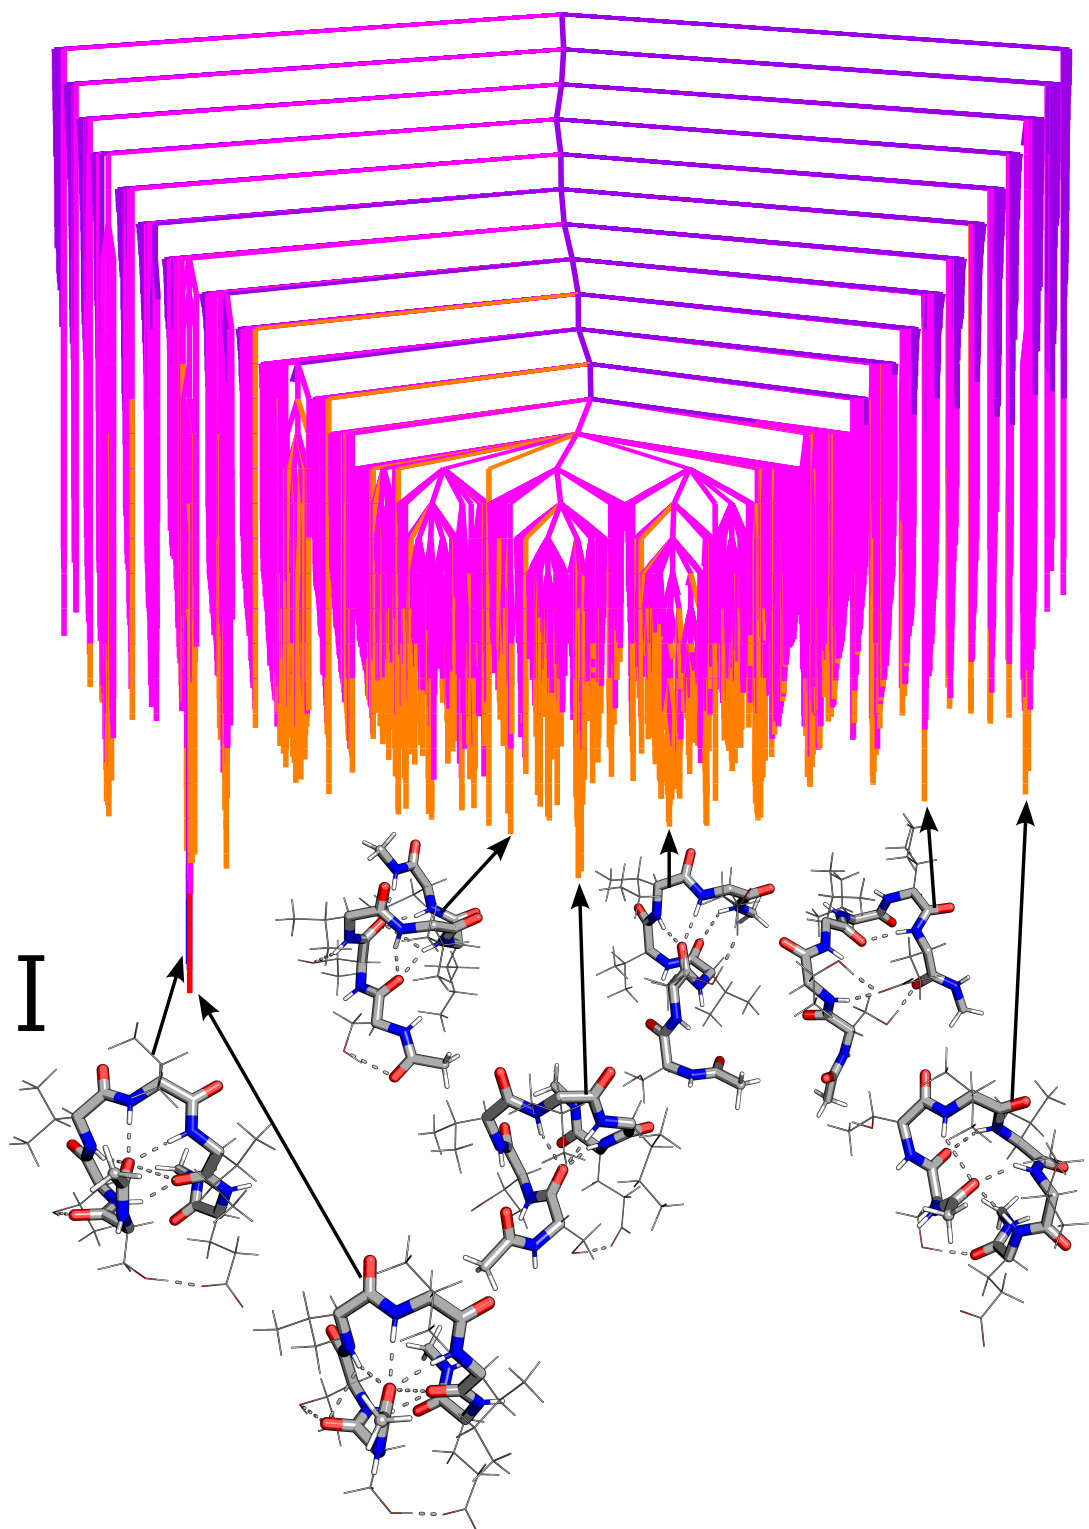

Figure S9: Disconnectivity graphs for STVVIE monomer. Local minima representing transition for peaks/inflection points are represented by red to blue (peak 1), green to orange (peak 2), pink to purple (peak 3) and grey to yellow (peak 4). The scalebar represents  $1 \text{ kcal mol}^{-1}$ .

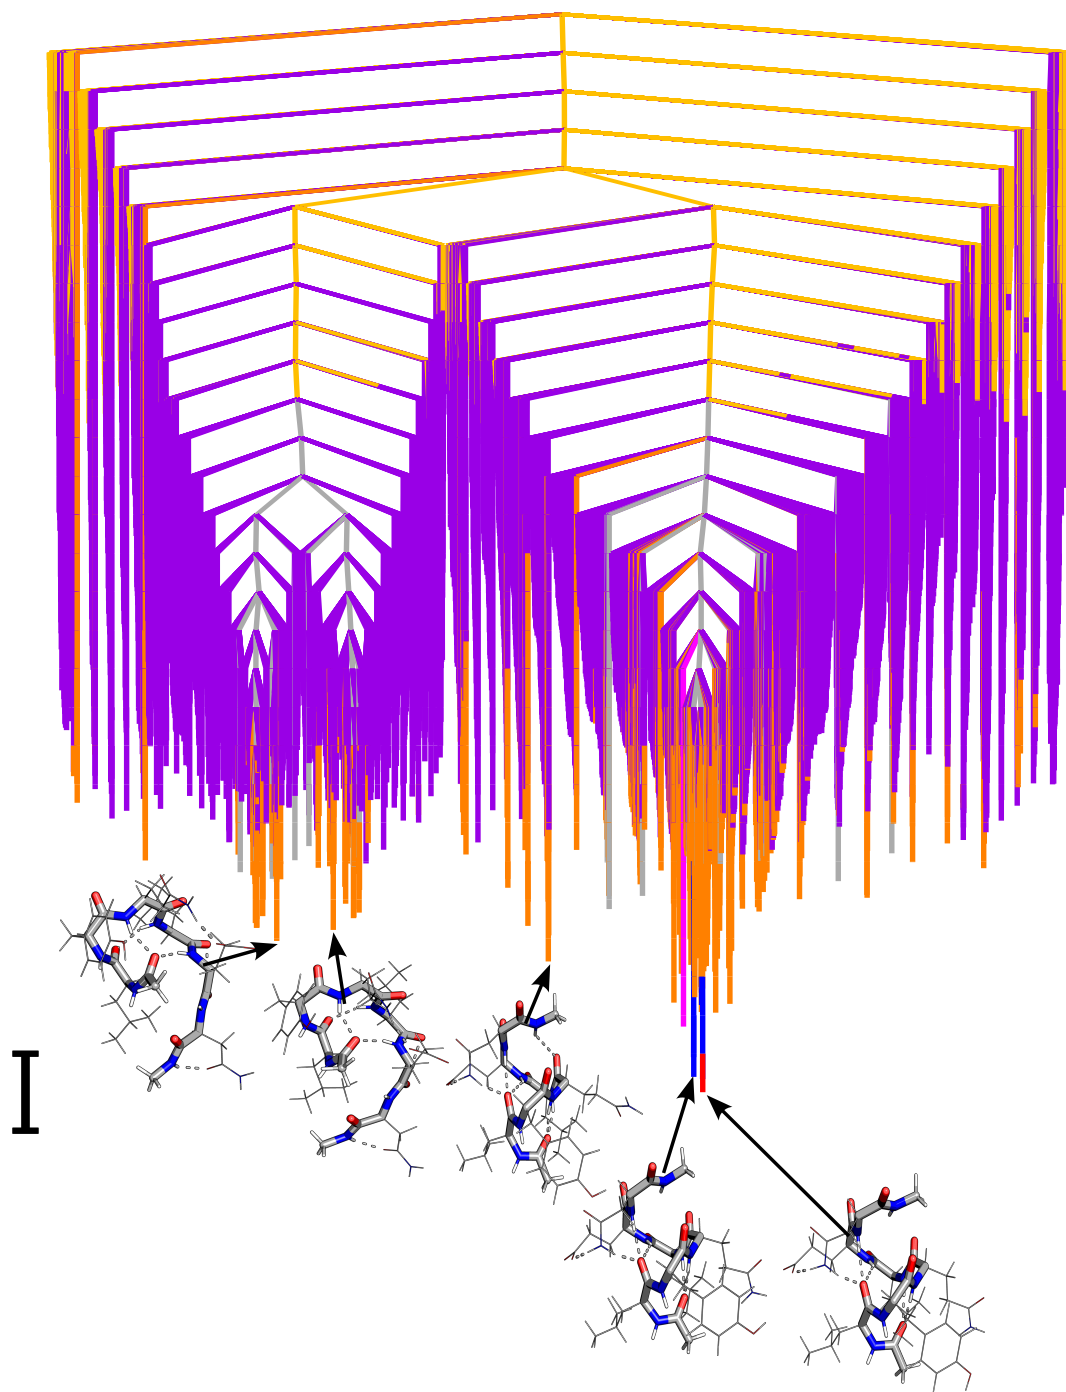

Figure S10: Disconnectivity graphs for **LYQLEN** monomer. Local minima representing transition for peaks/inflection points are represented by red to blue (peak 1), green to orange (peak 2), pink to purple (peak 3) and grey to yellow (peak 4). The scalebar represents 1 kcal mol<sup>-1</sup>.

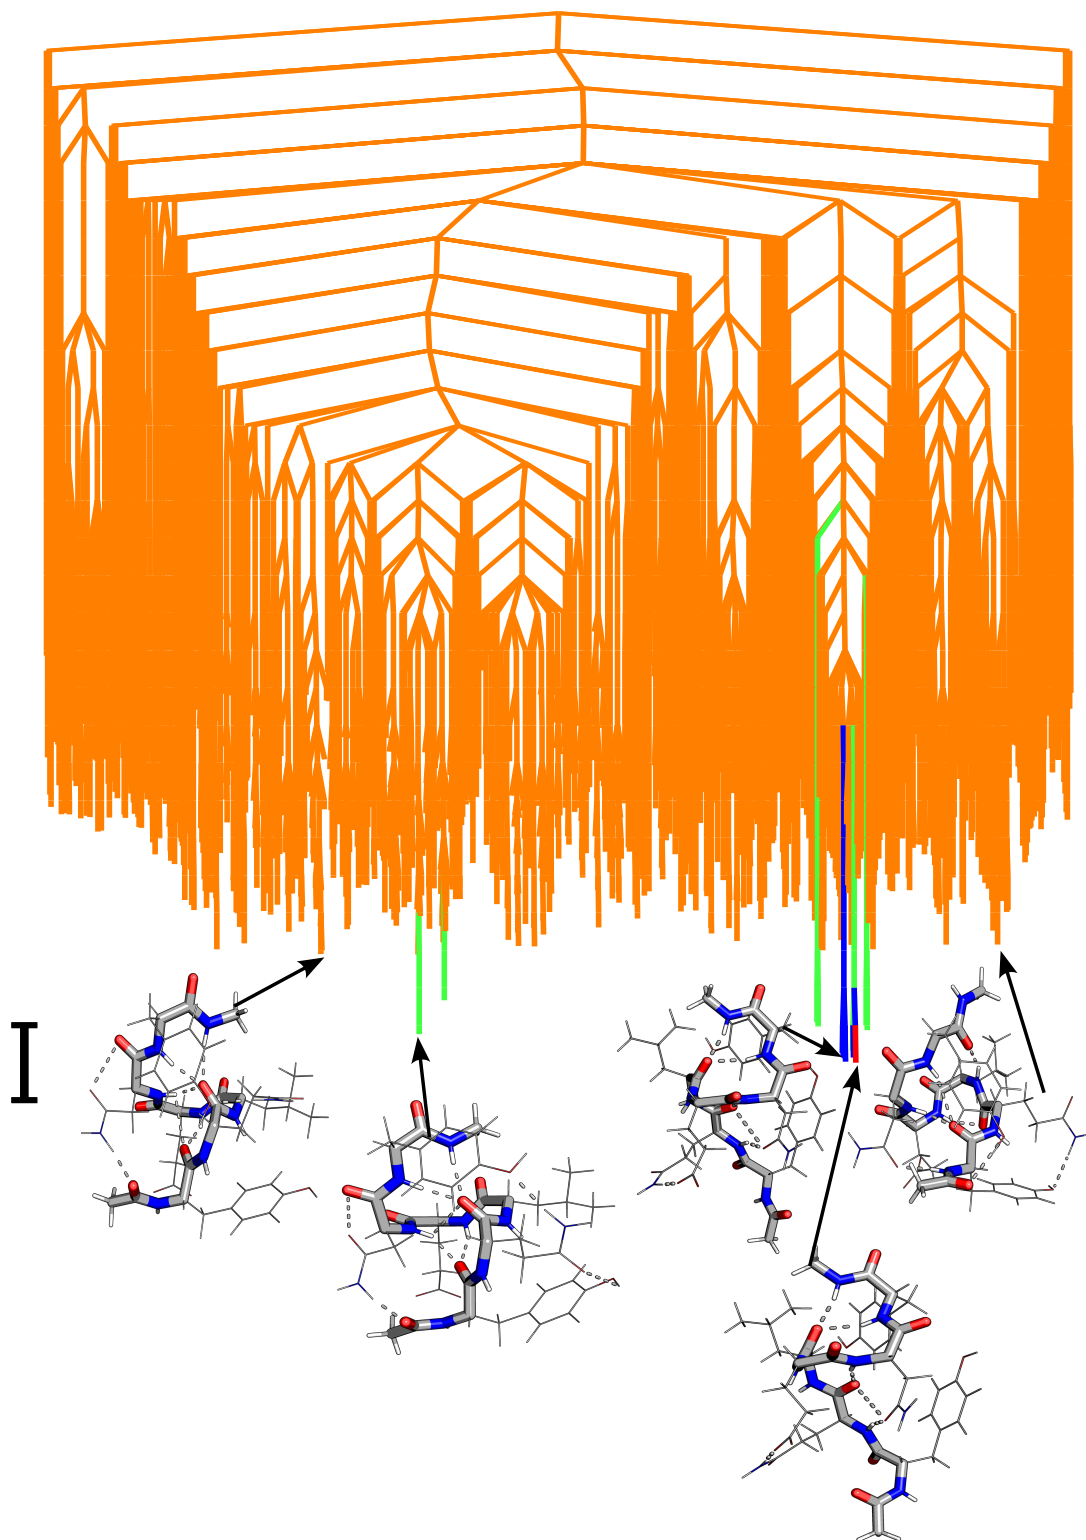

Figure S11: Disconnectivity graphs for YQLENY monomer. Local minima representing transition for peaks/inflection points are represented by red to blue (peak 1), green to orange (peak 2), pink to purple (peak 3) and grey to yellow (peak 4). The scalebar represents 1 kcal mol<sup>-1</sup>.

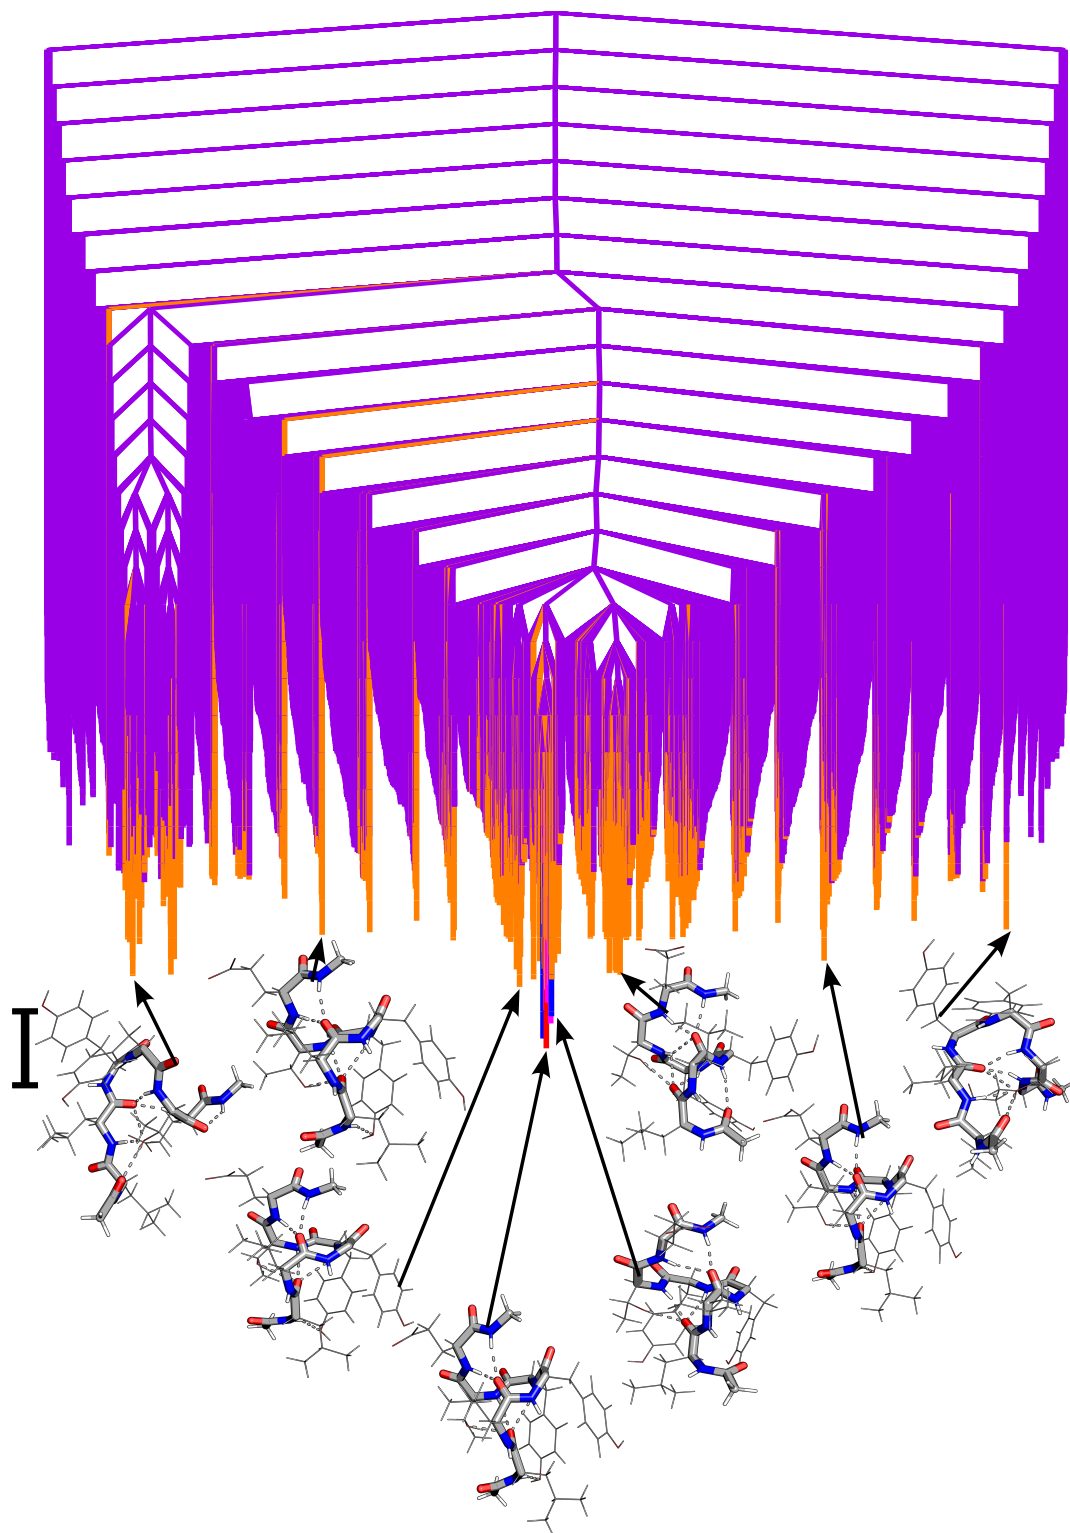

Figure S12: Disconnectivity graphs for **LLYTE** monomer. Local minima representing transition for peaks/inflection points are represented by red to blue (peak 1), green to orange (peak 2), pink to purple (peak 3) and grey to yellow (peak 4). The scalebar represents  $1 \text{ kcal mol}^{-1}$ .

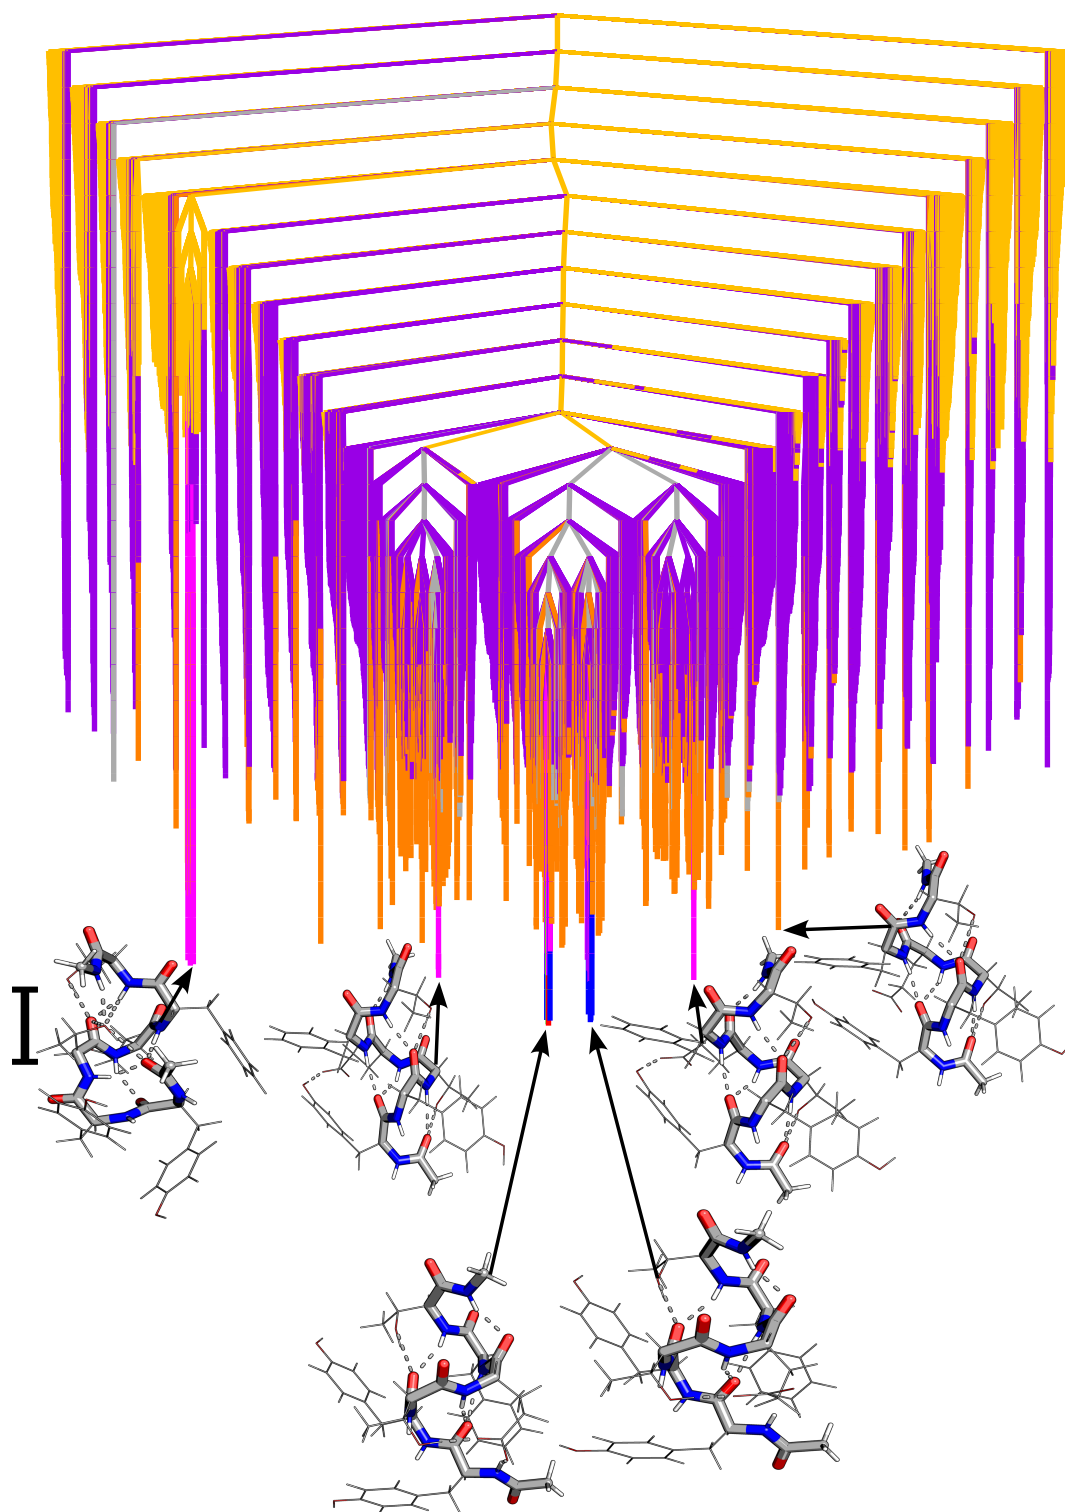

Figure S13: Disconnectivity graphs for YYTEFT monomer. Local minima representing transition for peaks/inflection points are represented by red to blue (peak 1), green to orange (peak 2), pink to purple (peak 3) and grey to yellow (peak 4). The scalebar represents  $1 \text{ kcal mol}^{-1}$ .

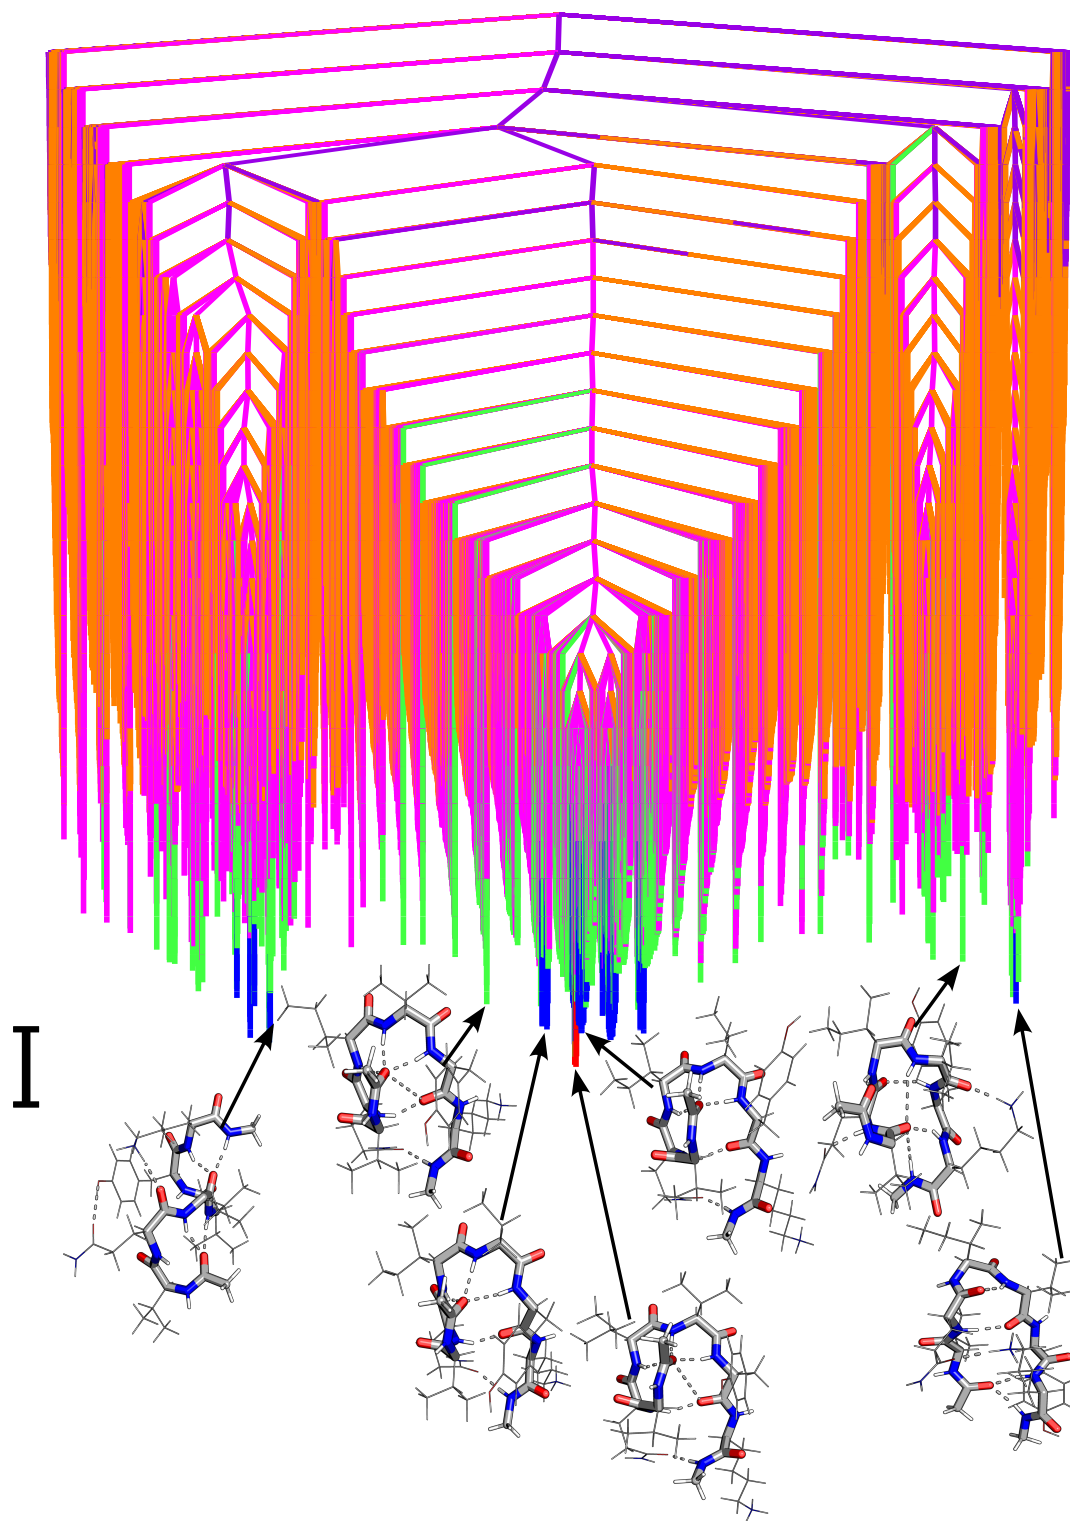

Figure S14: Disconnectivity graphs for **VQIVYK** monomer. Local minima representing transition for peaks/inflection points are represented by red to blue (peak 1), green to orange (peak 2), pink to purple (peak 3) and grey to yellow (peak 4). The scalebar represents 1 kcal mol<sup>-1</sup>.



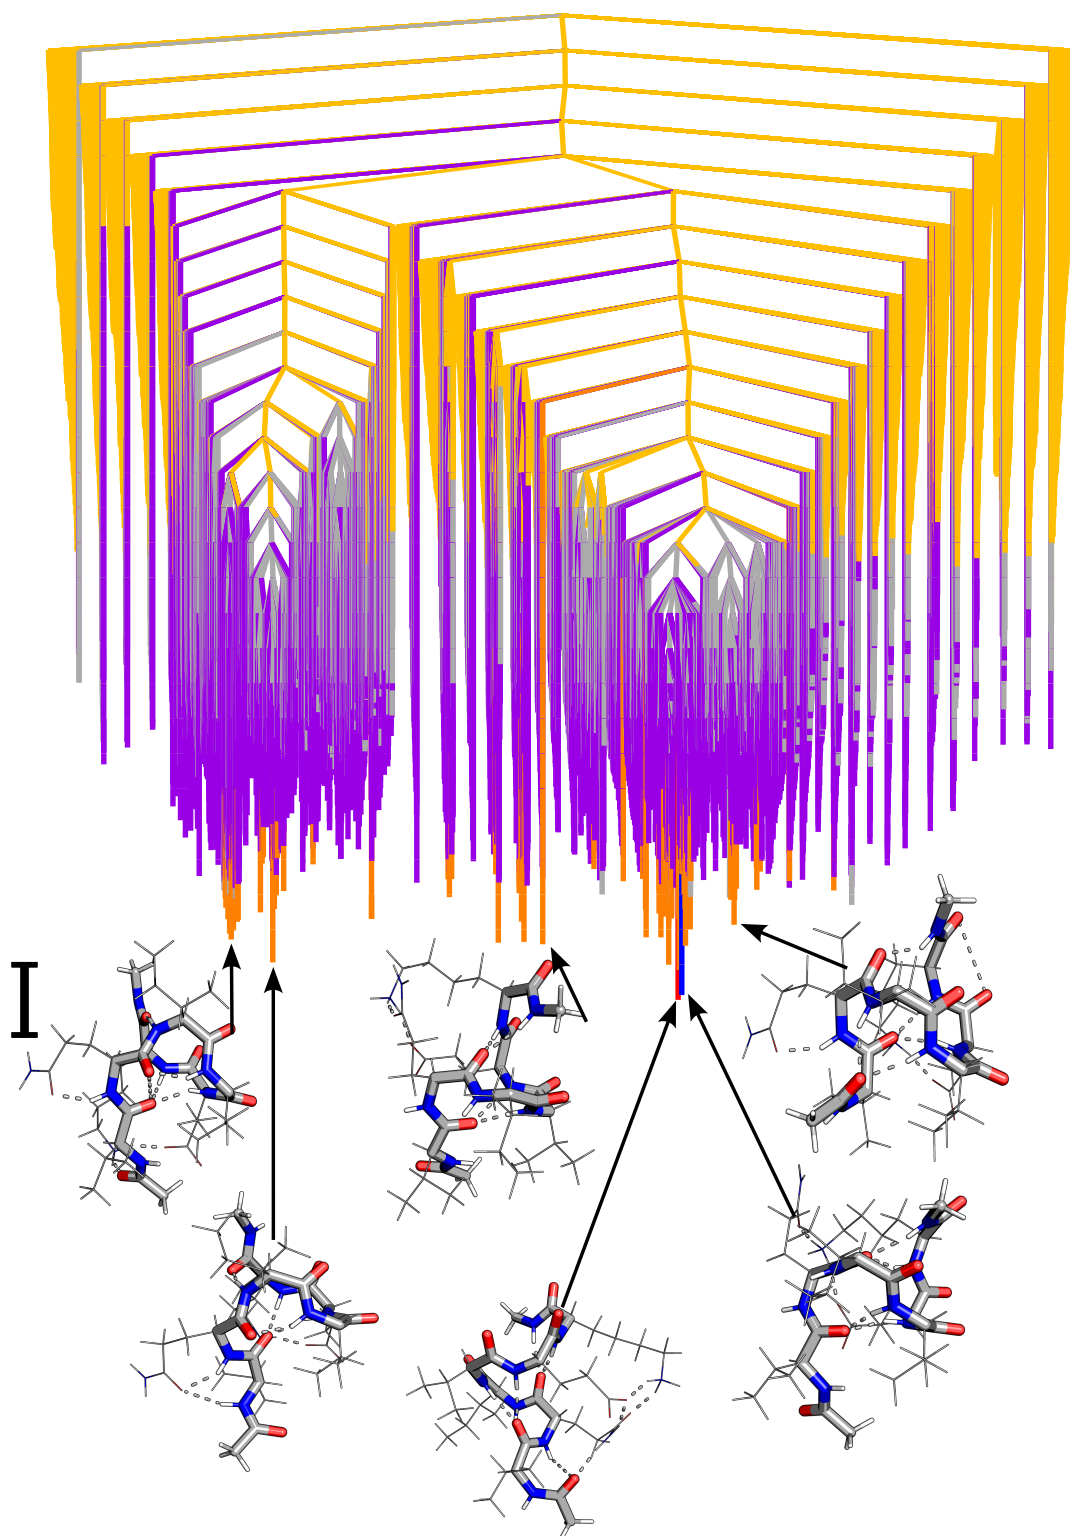

Figure S15: Disconnectivity graphs for VQIVEK monomer. Local minima representing transition for peaks/inflection points are represented by red to blue (peak 1), green to orange (peak 2), pink to purple (peak 3) and grey to yellow (peak 4). The scalebar represents  $1 \text{ kcal mol}^{-1}$ .



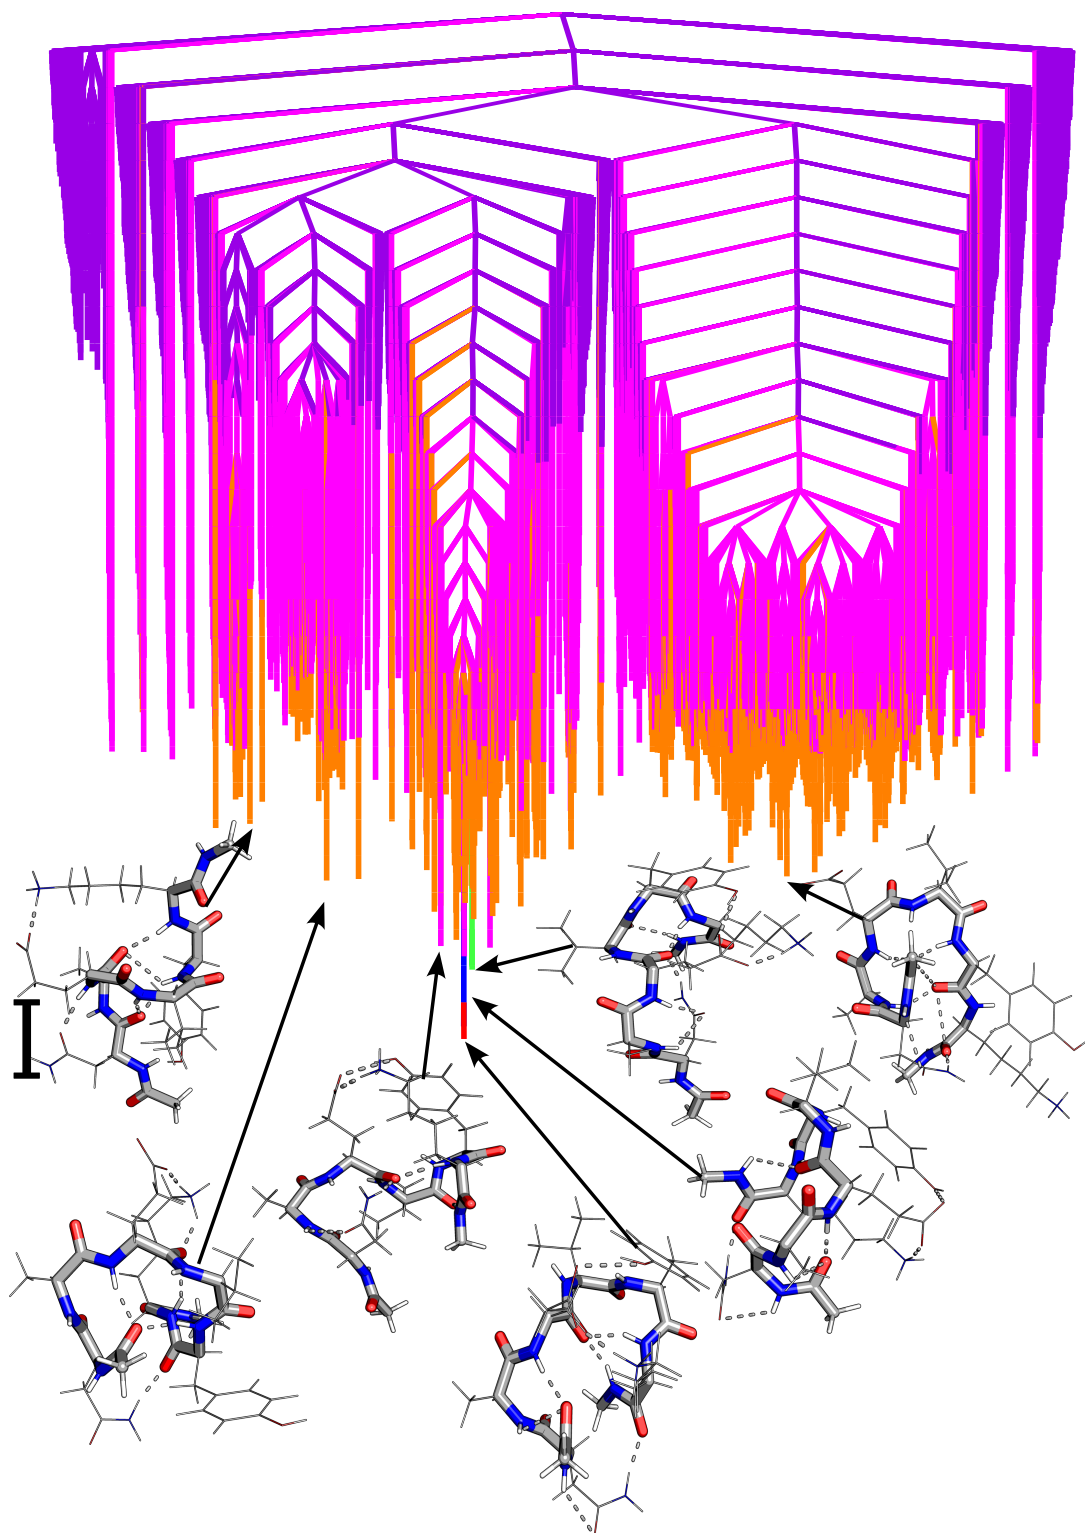

Figure S16: Disconnectivity graphs for NAEVYK monomer. Local minima representing transition for peaks/inflection points are represented by red to blue (peak 1), green to orange (peak 2), pink to purple (peak 3) and grey to yellow (peak 4). The scalebar represents 1 kcal mol<sup>-1</sup>.

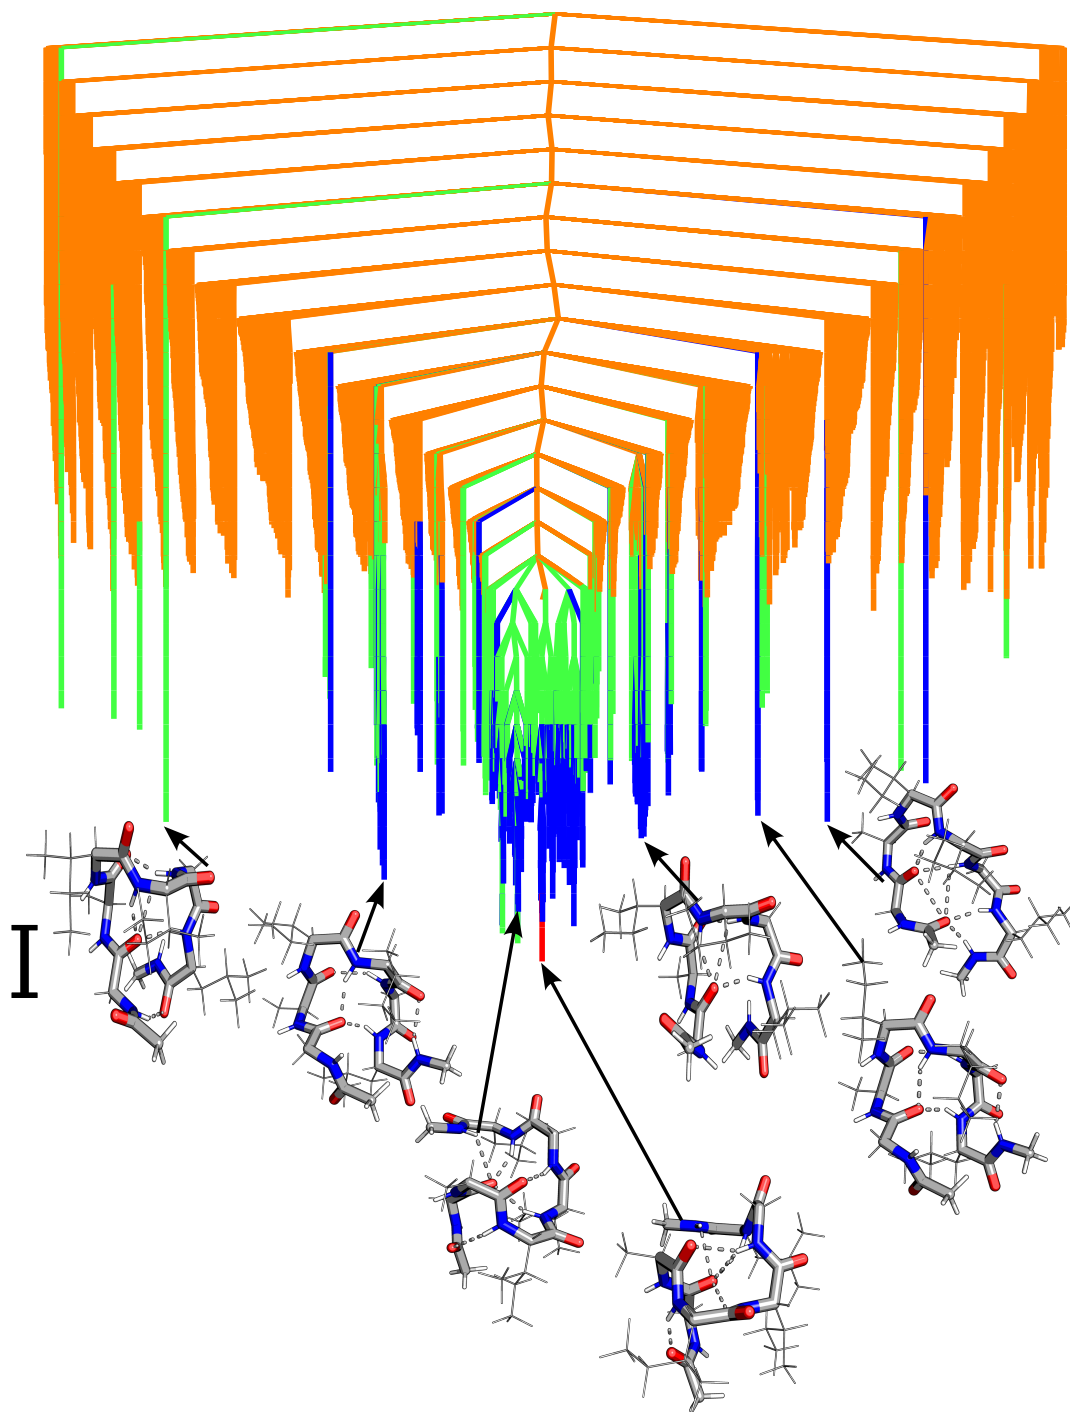

Figure S17: Disconnectivity graphs for **GAIIGL** monomer. Local minima representing transition for peaks/inflection points are represented by red to blue (peak 1), green to orange (peak 2), pink to purple (peak 3) and grey to yellow (peak 4). The scalebar represents  $1 \text{ kcal mol}^{-1}$ .

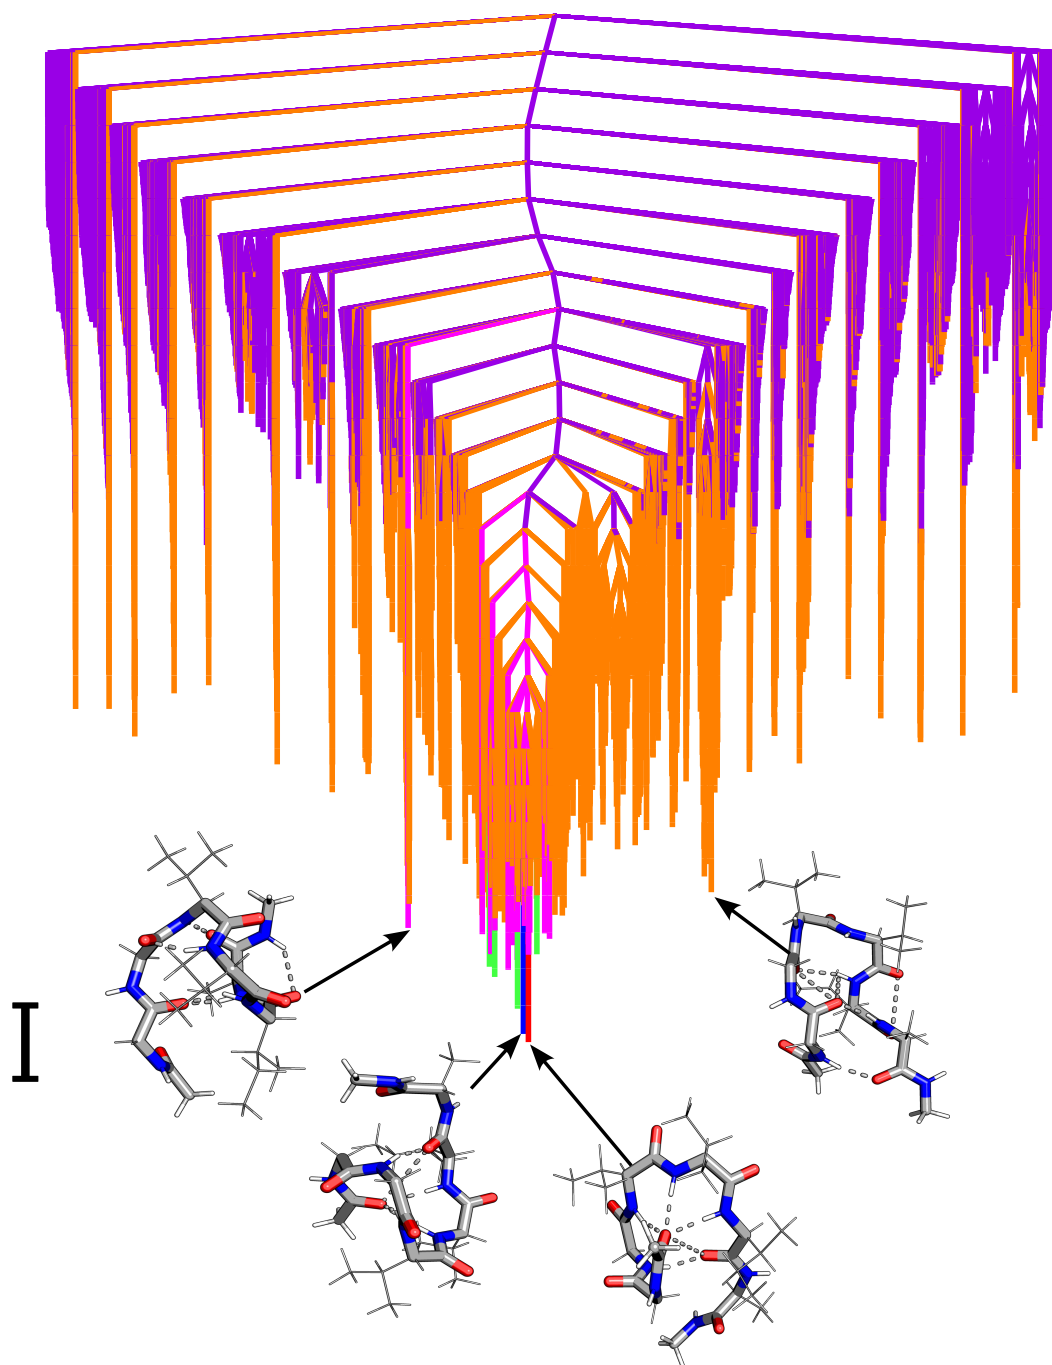

Figure S18: Disconnectivity graphs for **GGVVIA** monomer. Local minima representing transition for peaks/inflection points are represented by red to blue (peak 1), green to orange (peak 2), pink to purple (peak 3) and grey to yellow (peak 4). The scalebar represents 1 kcal mol<sup>-1</sup>.

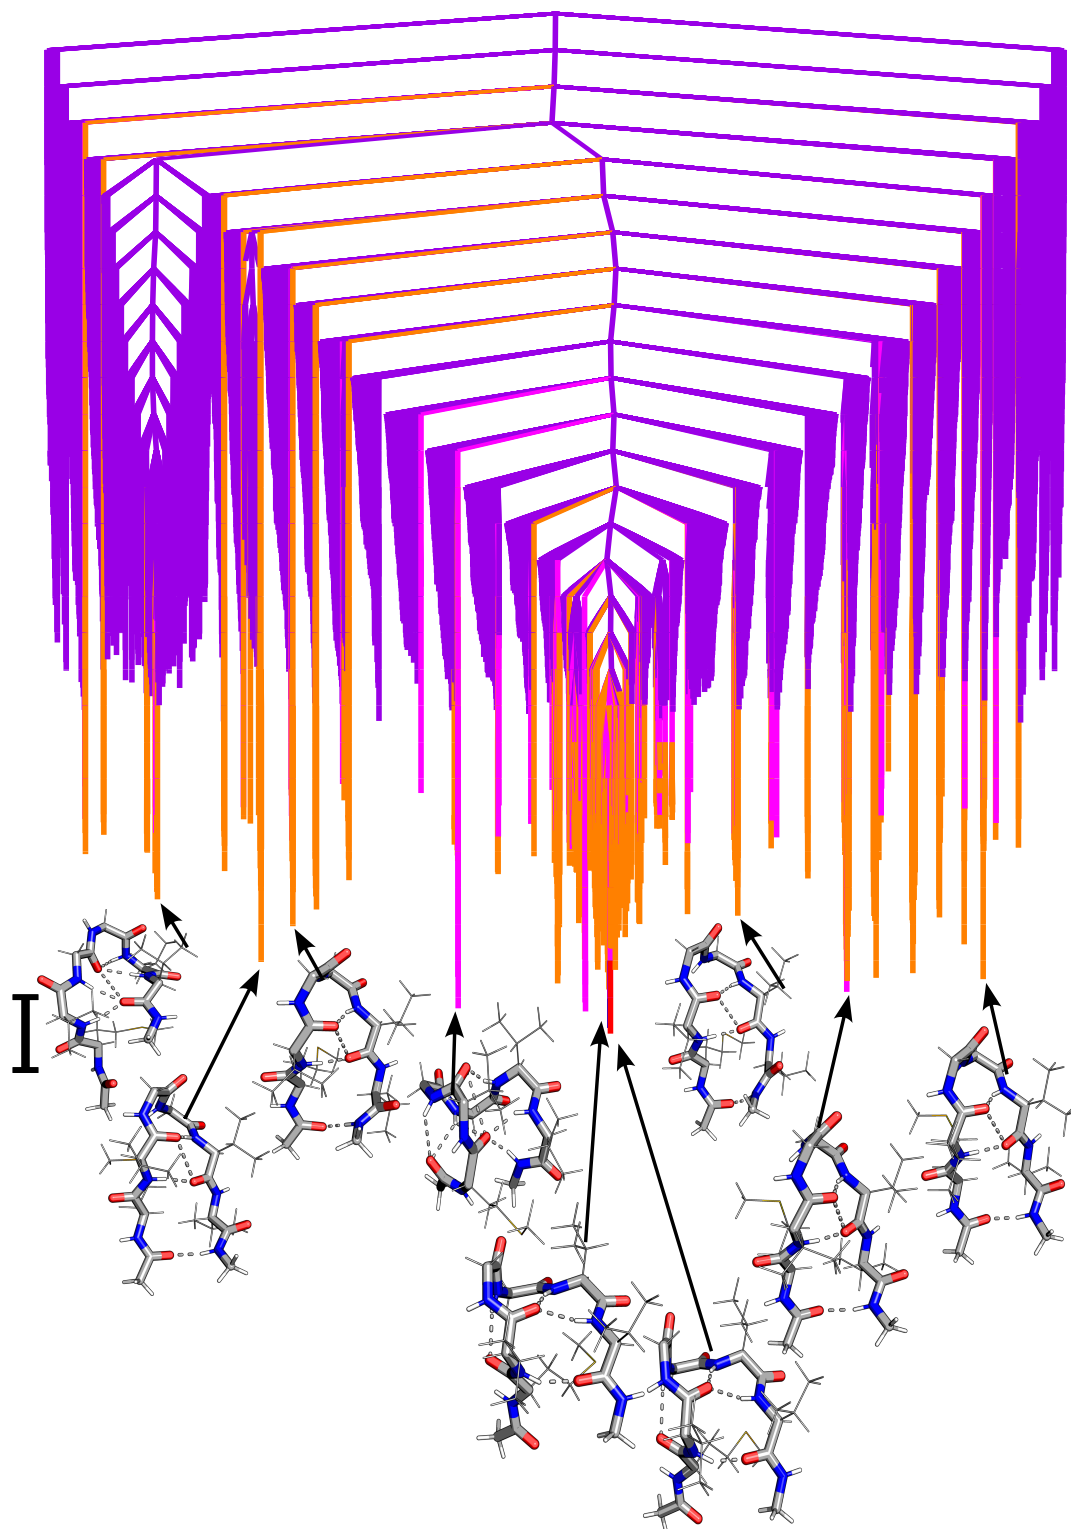

Figure S19: Disconnectivity graphs for **MVGGVV** monomer. Local minima representing transition for peaks/inflection points are represented by red to blue (peak 1), green to orange (peak 2), pink to purple (peak 3) and grey to yellow (peak 4). The scalebar represents 1 kcal mol<sup>-1</sup>.

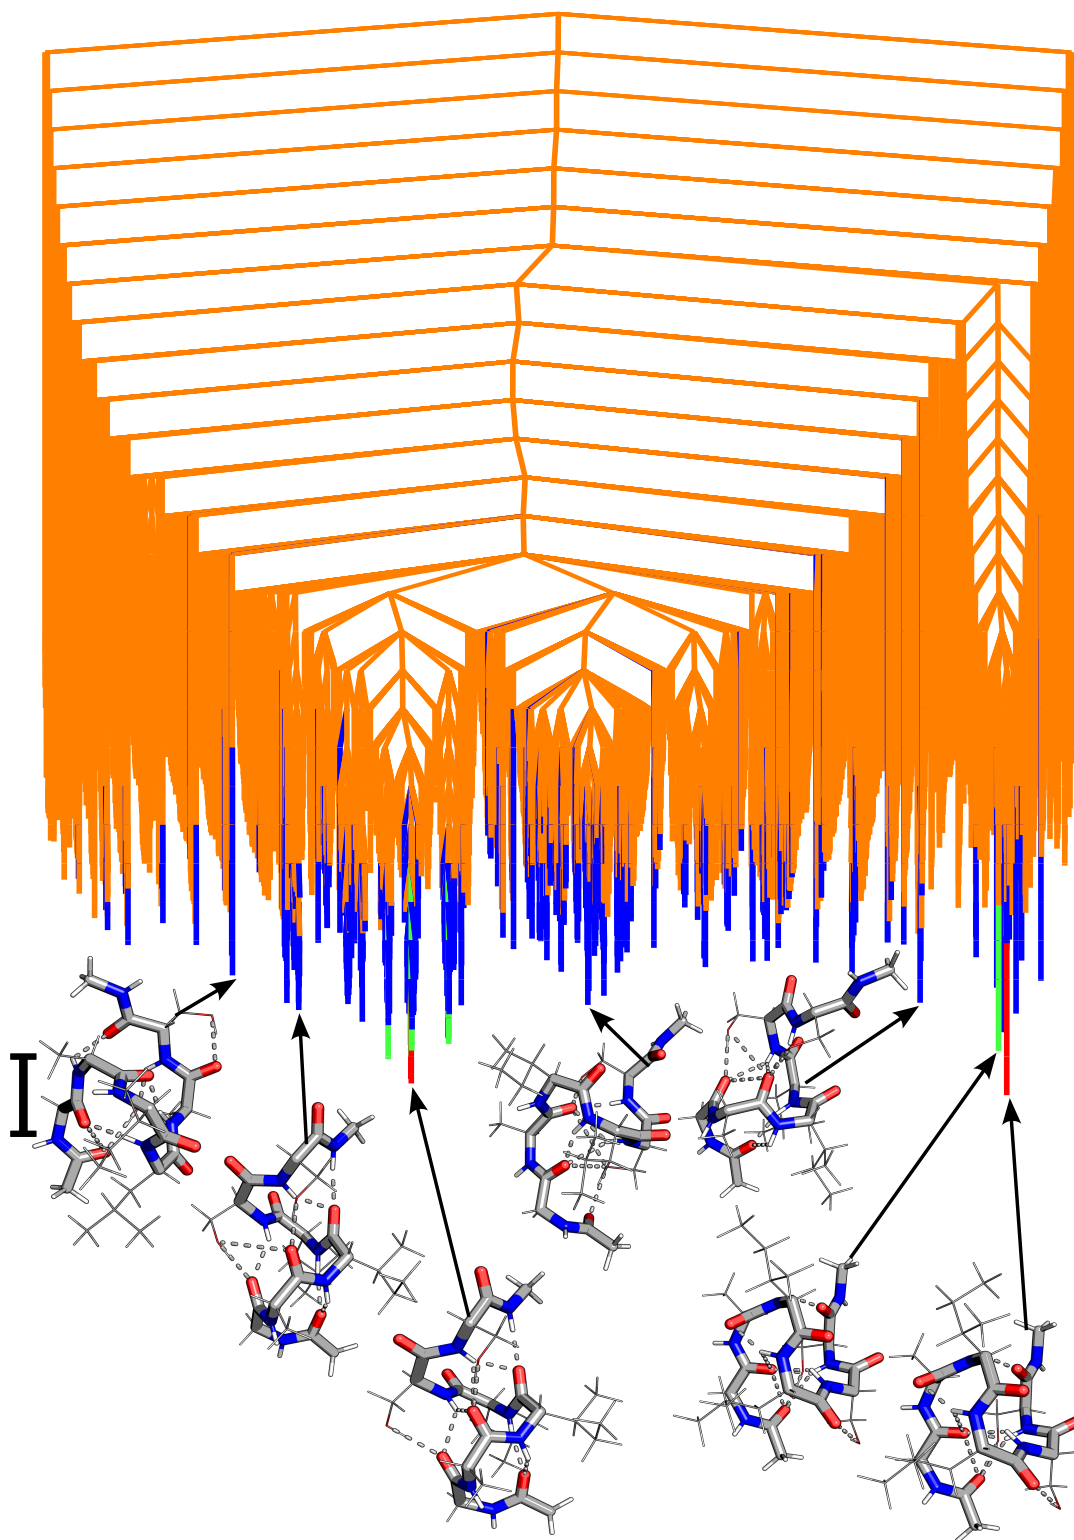

Figure S20: Disconnectivity graphs for **GAILSS** monomer. Local minima representing transition for peaks/inflection points are represented by red to blue (peak 1), green to orange (peak 2), pink to purple (peak 3) and grey to yellow (peak 4). The scalebar represents 1 kcal mol<sup>-1</sup>.

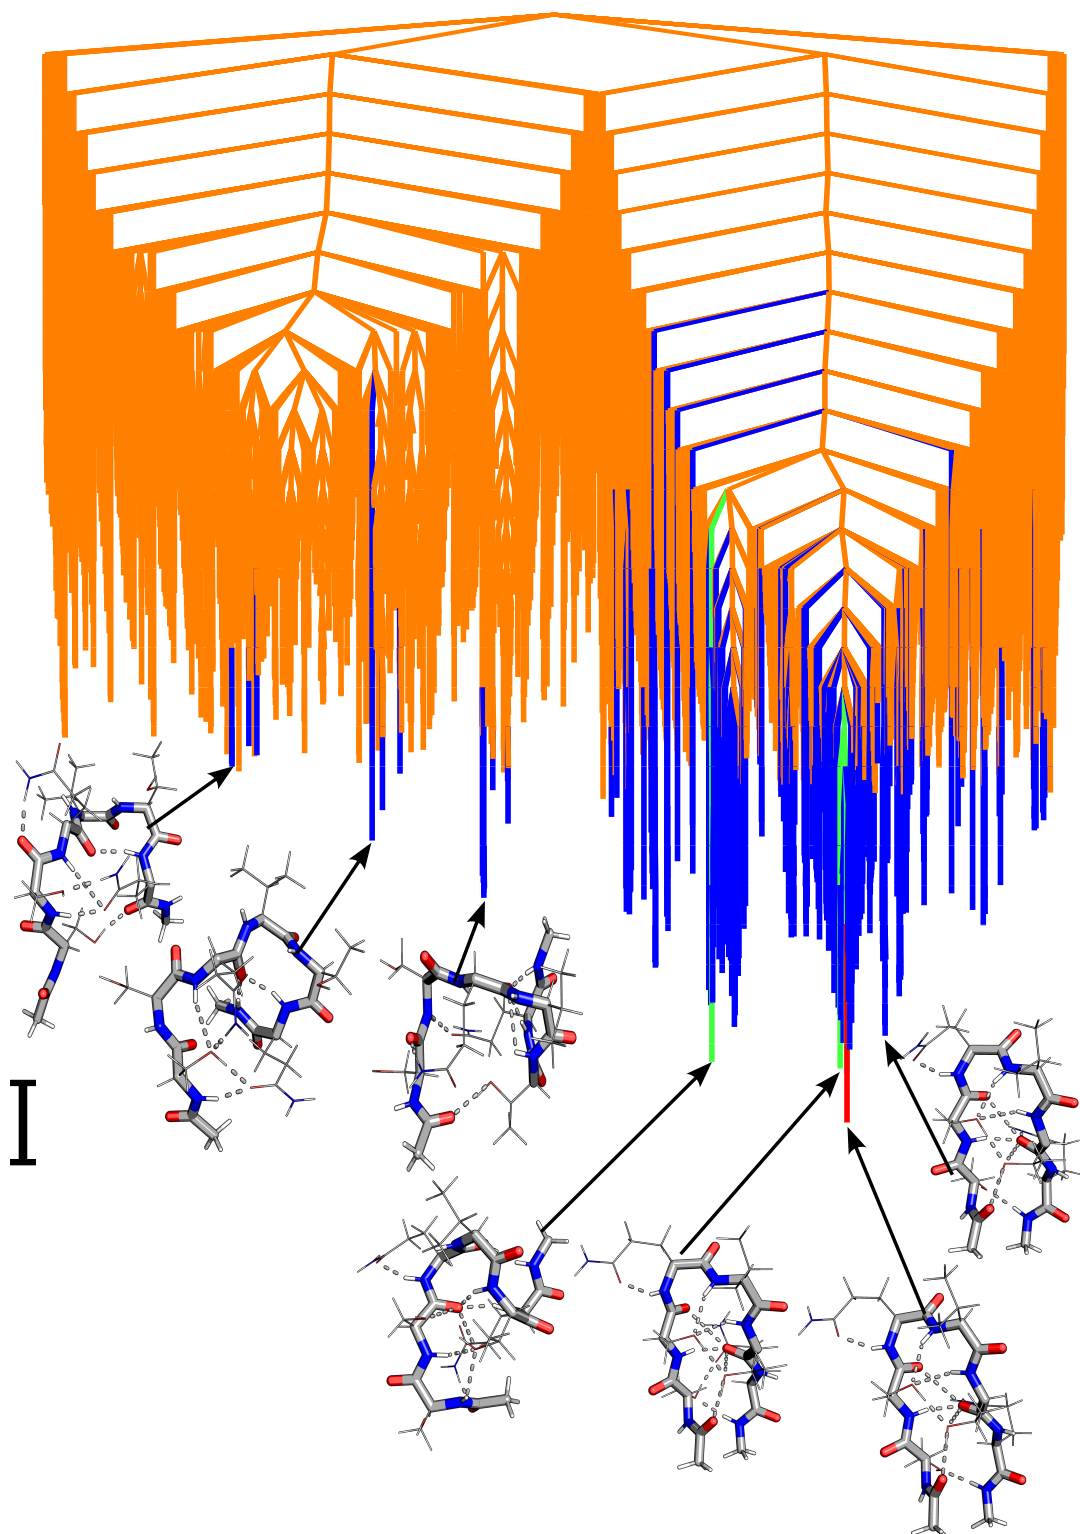

Figure S21: Disconnectivity graphs for **SSQVTQ** monomer. Local minima representing transition for peaks/inflection points are represented by red to blue (peak 1), green to orange (peak 2), pink to purple (peak 3) and grey to yellow (peak 4). The scalebar represents 1 kcal mol<sup>-1</sup>.

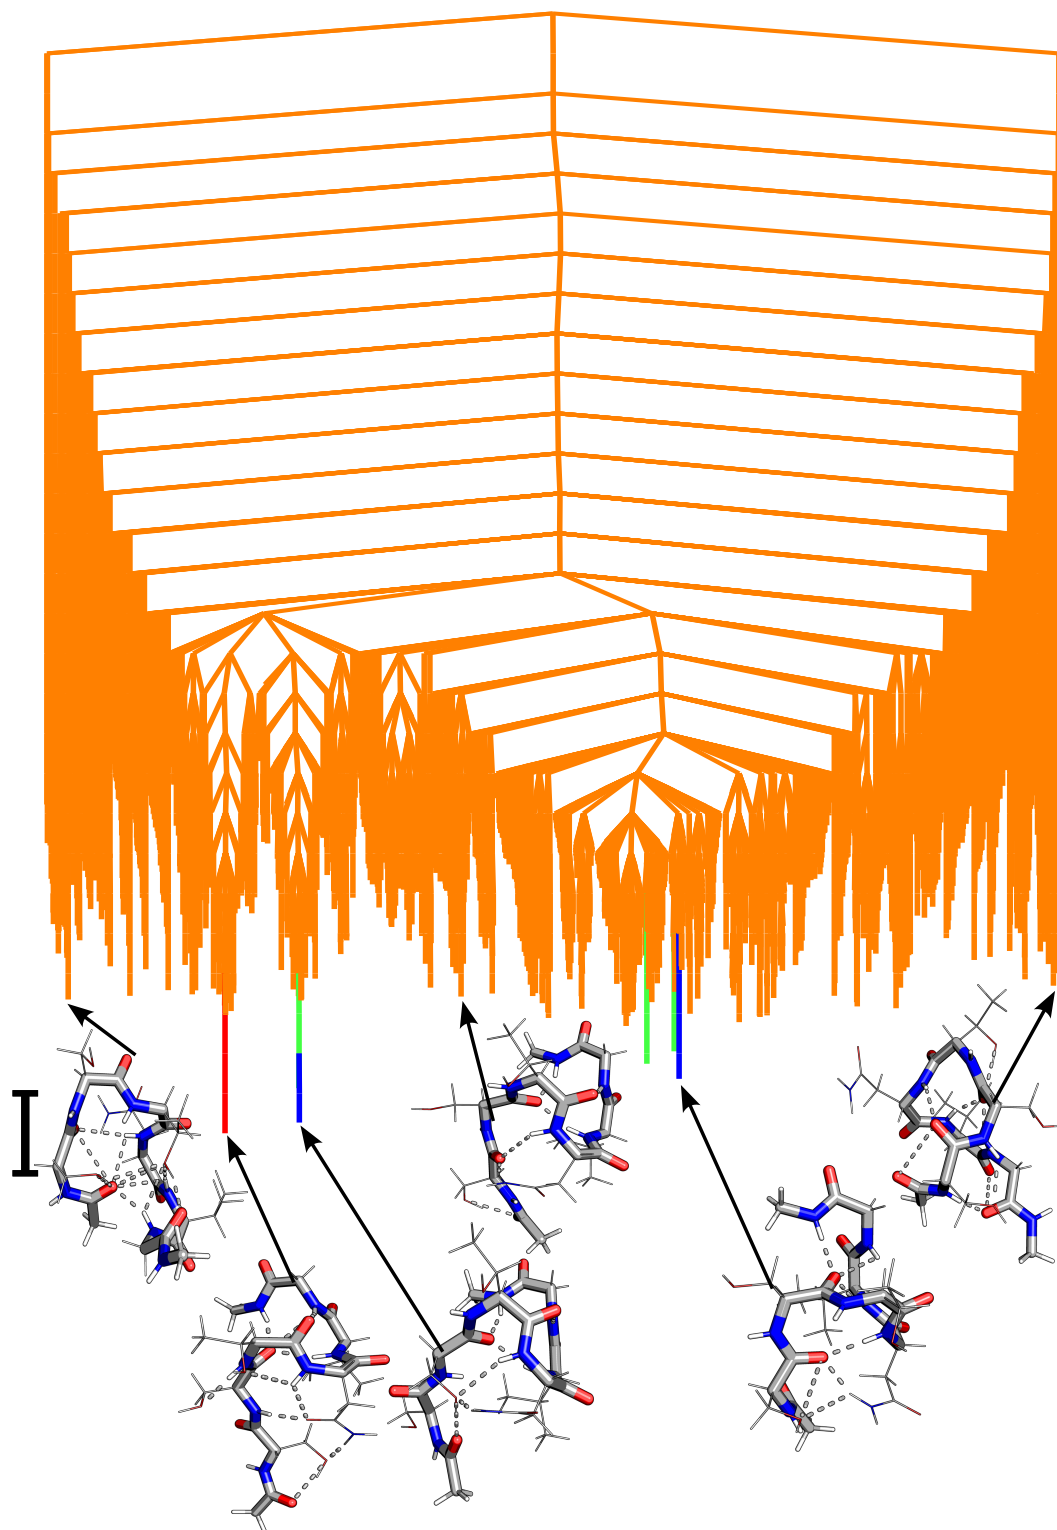

Figure S22: Disconnectivity graphs for **SSTNVG** monomer. Local minima representing transition for peaks/inflection points are represented by red to blue (peak 1), green to orange (peak 2), pink to purple (peak 3) and grey to yellow (peak 4). The scalebar represents 1 kcal mol<sup>-1</sup>.

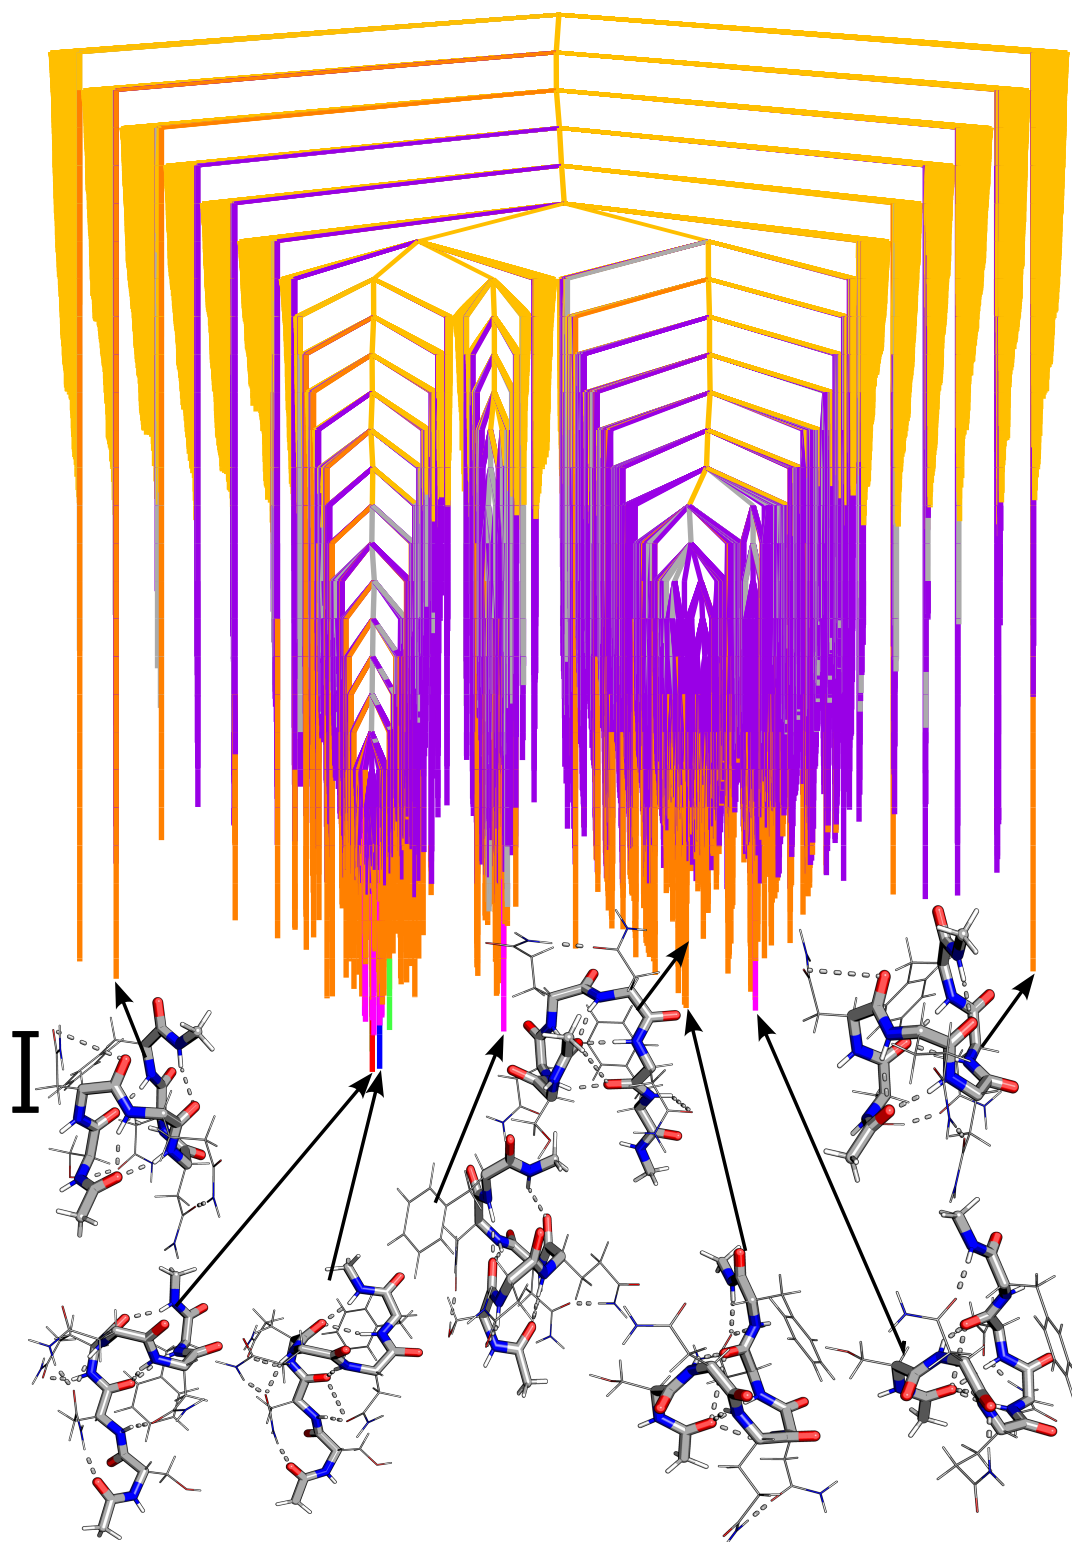

Figure S23: Disconnectivity graphs for **SNQNNF** monomer. Local minima representing transition for peaks/inflection points are represented by red to blue (peak 1), green to orange (peak 2), pink to purple (peak 3) and grey to yellow (peak 4). The scalebar represents 1 kcal mol<sup>-1</sup>.



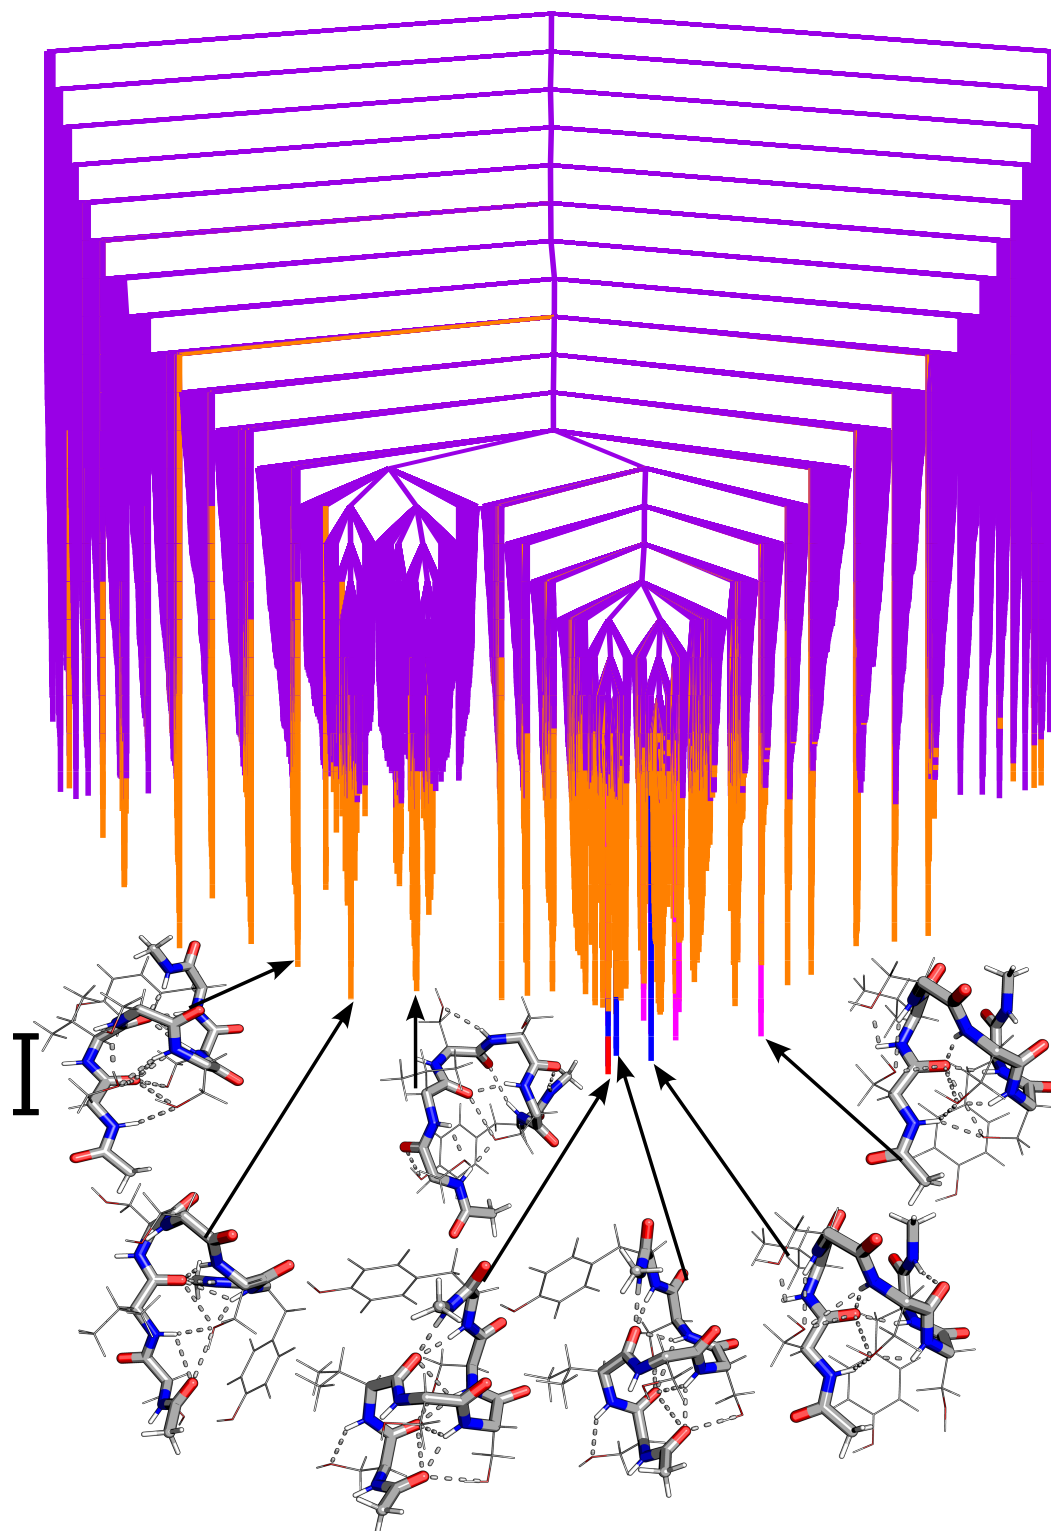

Figure S24: Disconnectivity graphs for **SVSSSY** monomer. Local minima representing transition for peaks/inflection points are represented by red to blue (peak 1), green to orange (peak 2), pink to purple (peak 3) and grey to yellow (peak 4). The scalebar represents  $1 \text{ kcal mol}^{-1}$ .

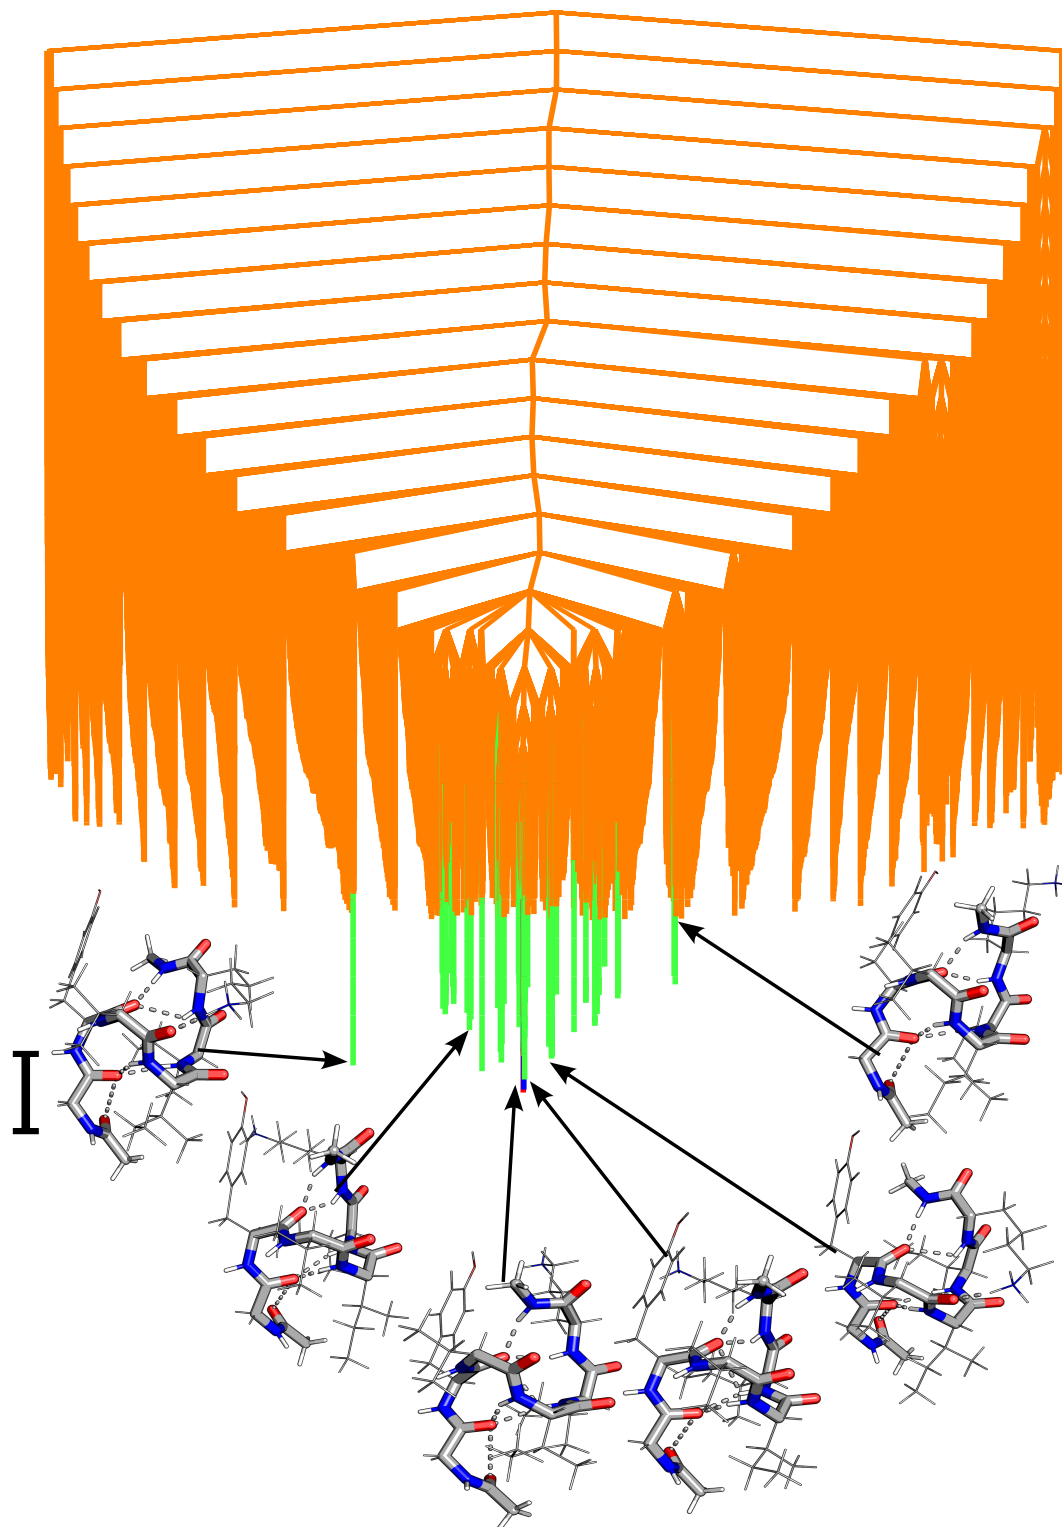

Figure S25: Disconnectivity graphs for **GYVIK** monomer. Local minima representing transition for peaks/inflection points are represented by red to blue (peak 1), green to orange (peak 2), pink to purple (peak 3) and grey to yellow (peak 4). The scalebar represents  $1 \text{ kcal mol}^{-1}$ .

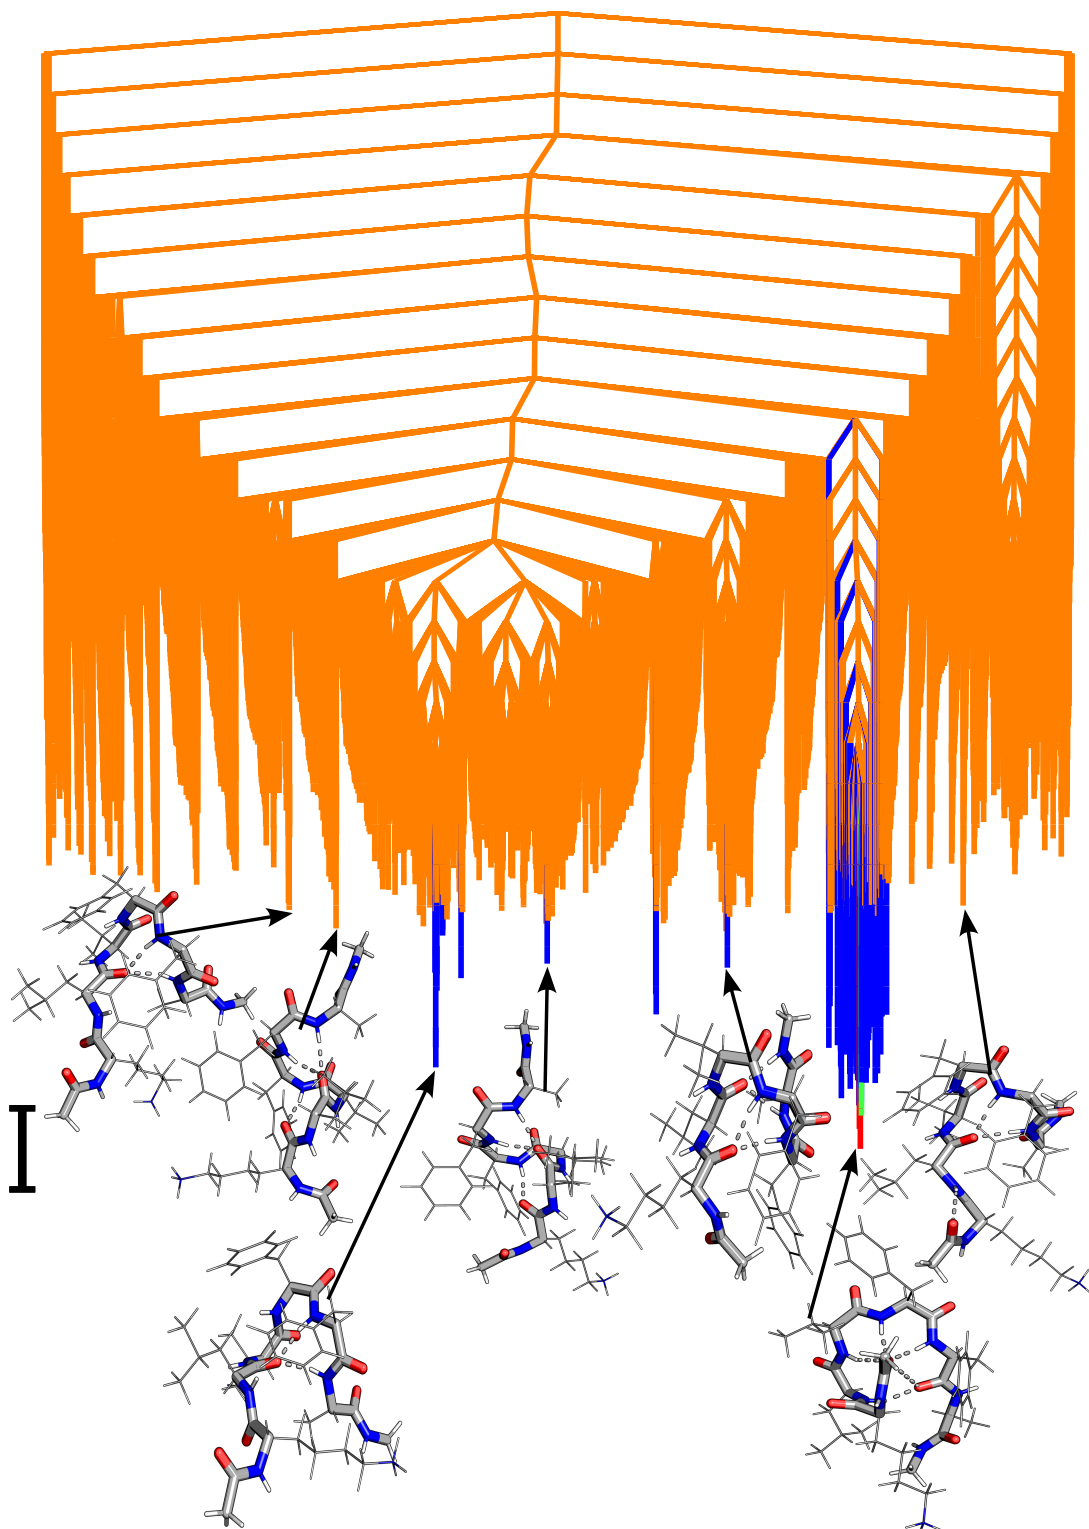

Figure S26: Disconnectivity graphs for **KLVFFA** monomer. Local minima representing transition for peaks/inflection points are represented by red to blue (peak 1), green to orange (peak 2), pink to purple (peak 3) and grey to yellow (peak 4). The scalebar represents 1 kcal mol<sup>-1</sup>.

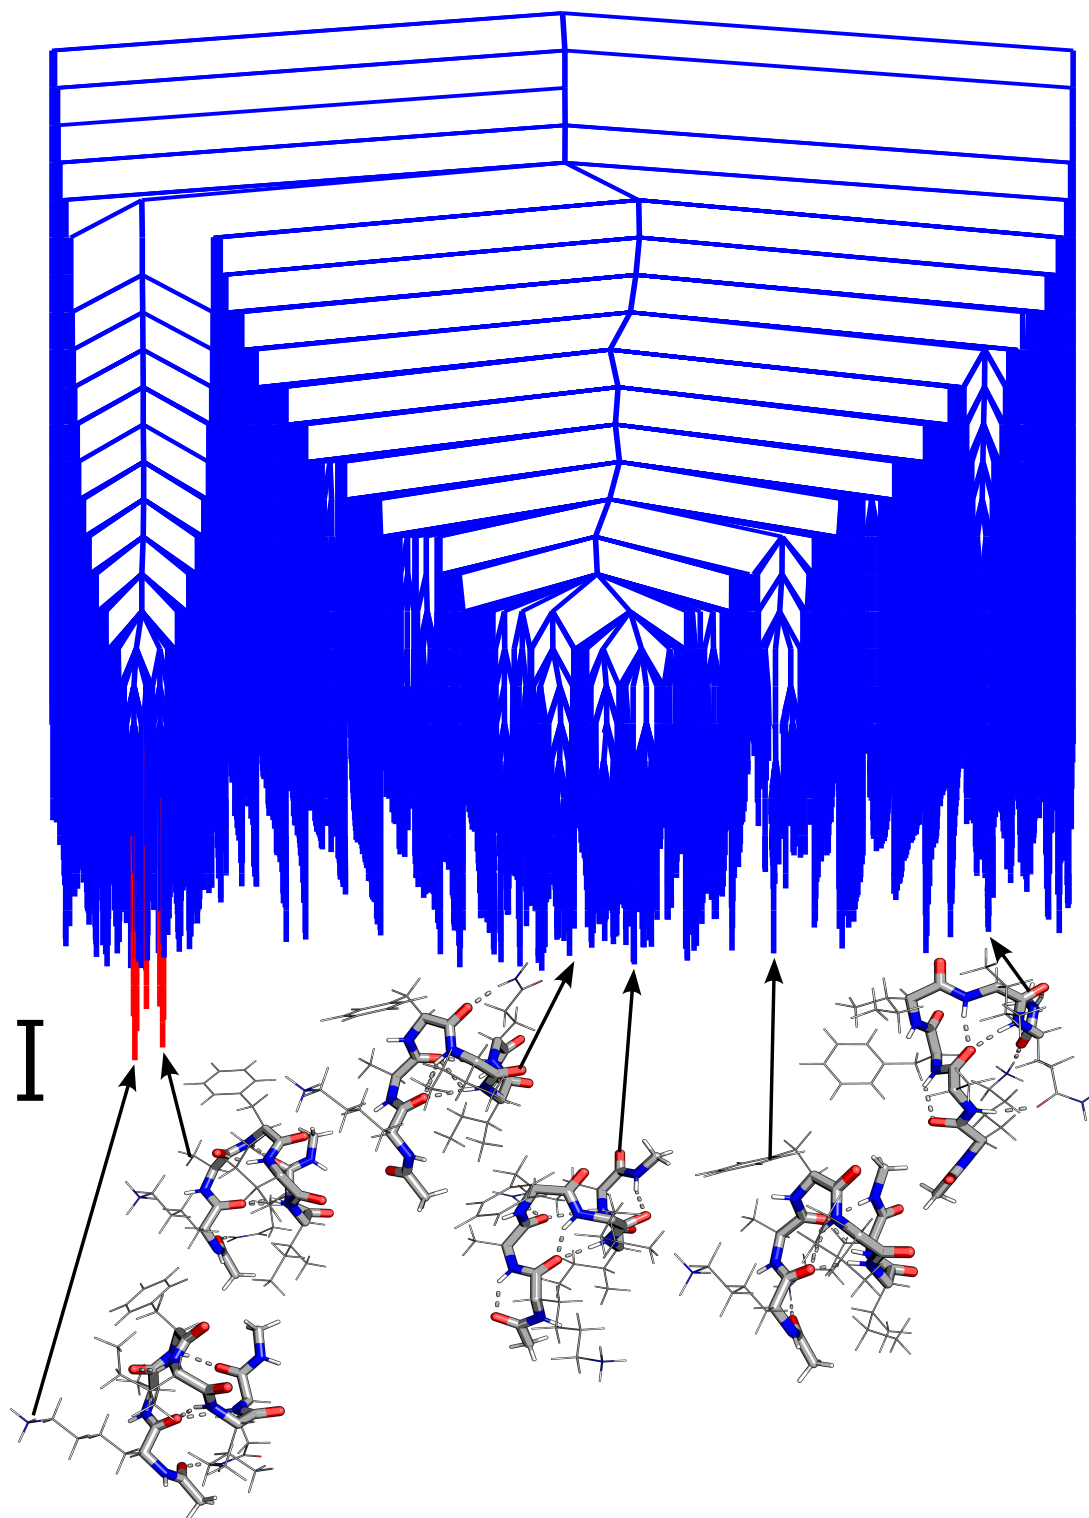

Figure S27: Disconnectivity graphs for KAFIIQ monomer. Local minima representing transition for peaks/inflection points are represented by red to blue (peak 1), green to orange (peak 2), pink to purple (peak 3) and grey to yellow (peak 4). The scalebar represents 1 kcal mol<sup>-1</sup>.

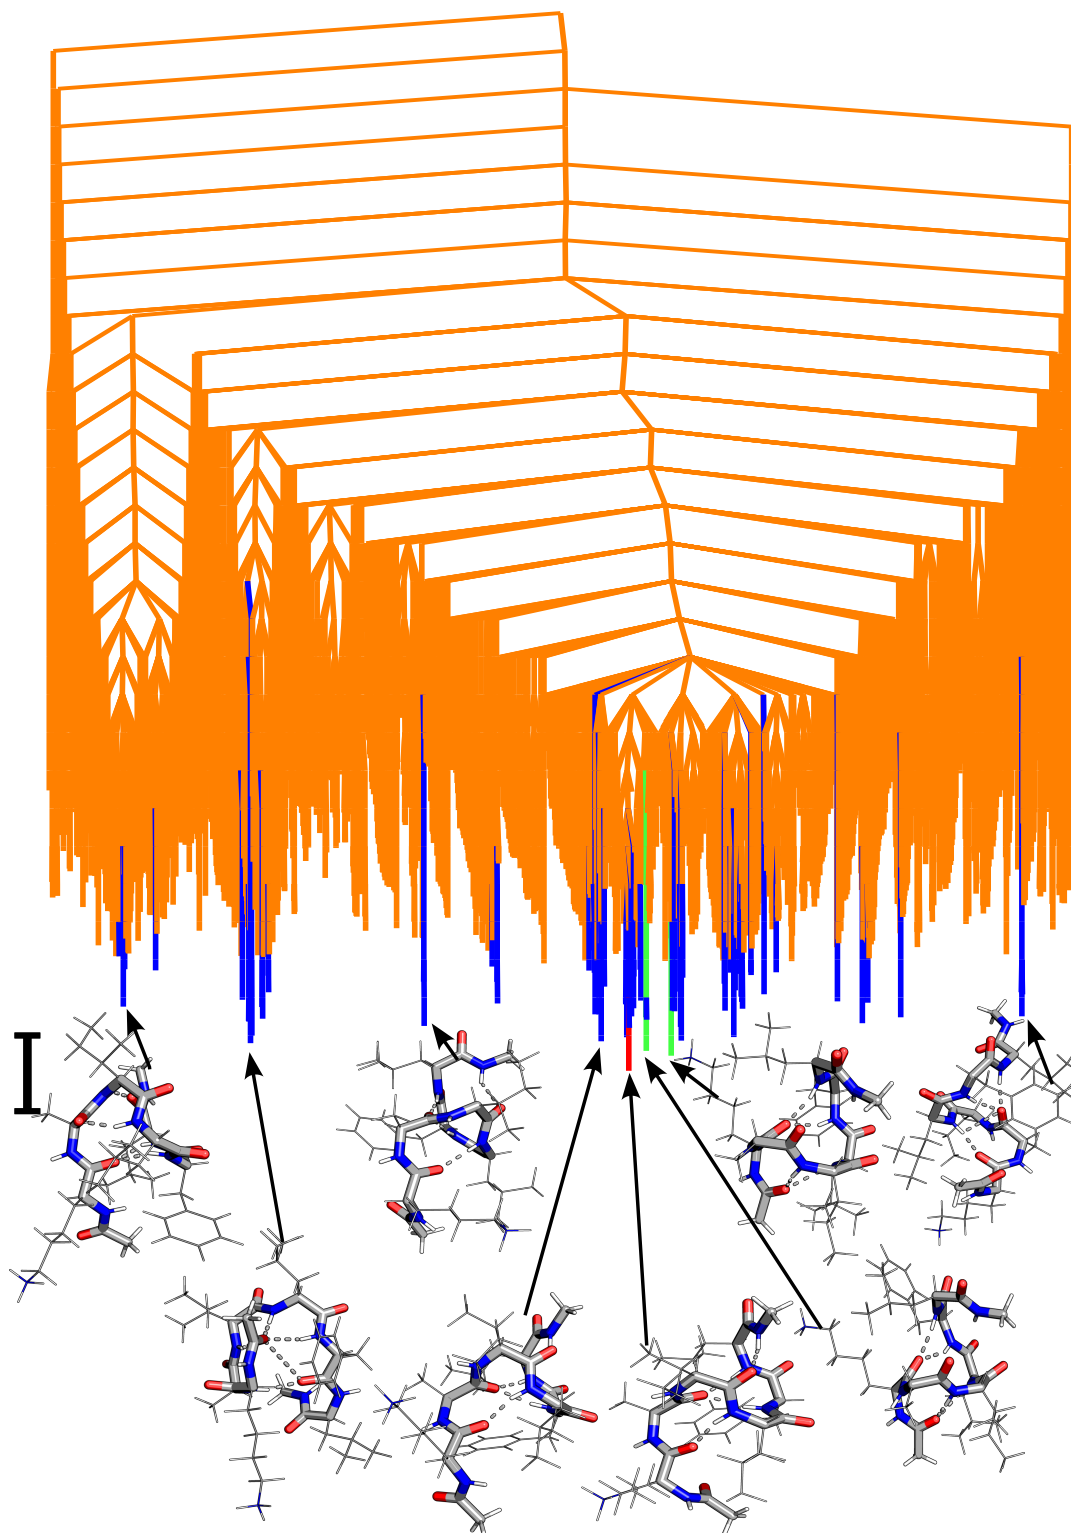

Figure S28: Disconnectivity graphs for KAILFL monomer. Local minima representing transition for peaks/inflection points are represented by red to blue (peak 1), green to orange (peak 2), pink to purple (peak 3) and grey to yellow (peak 4). The scalebar represents 1 kcal mol<sup>-1</sup>.

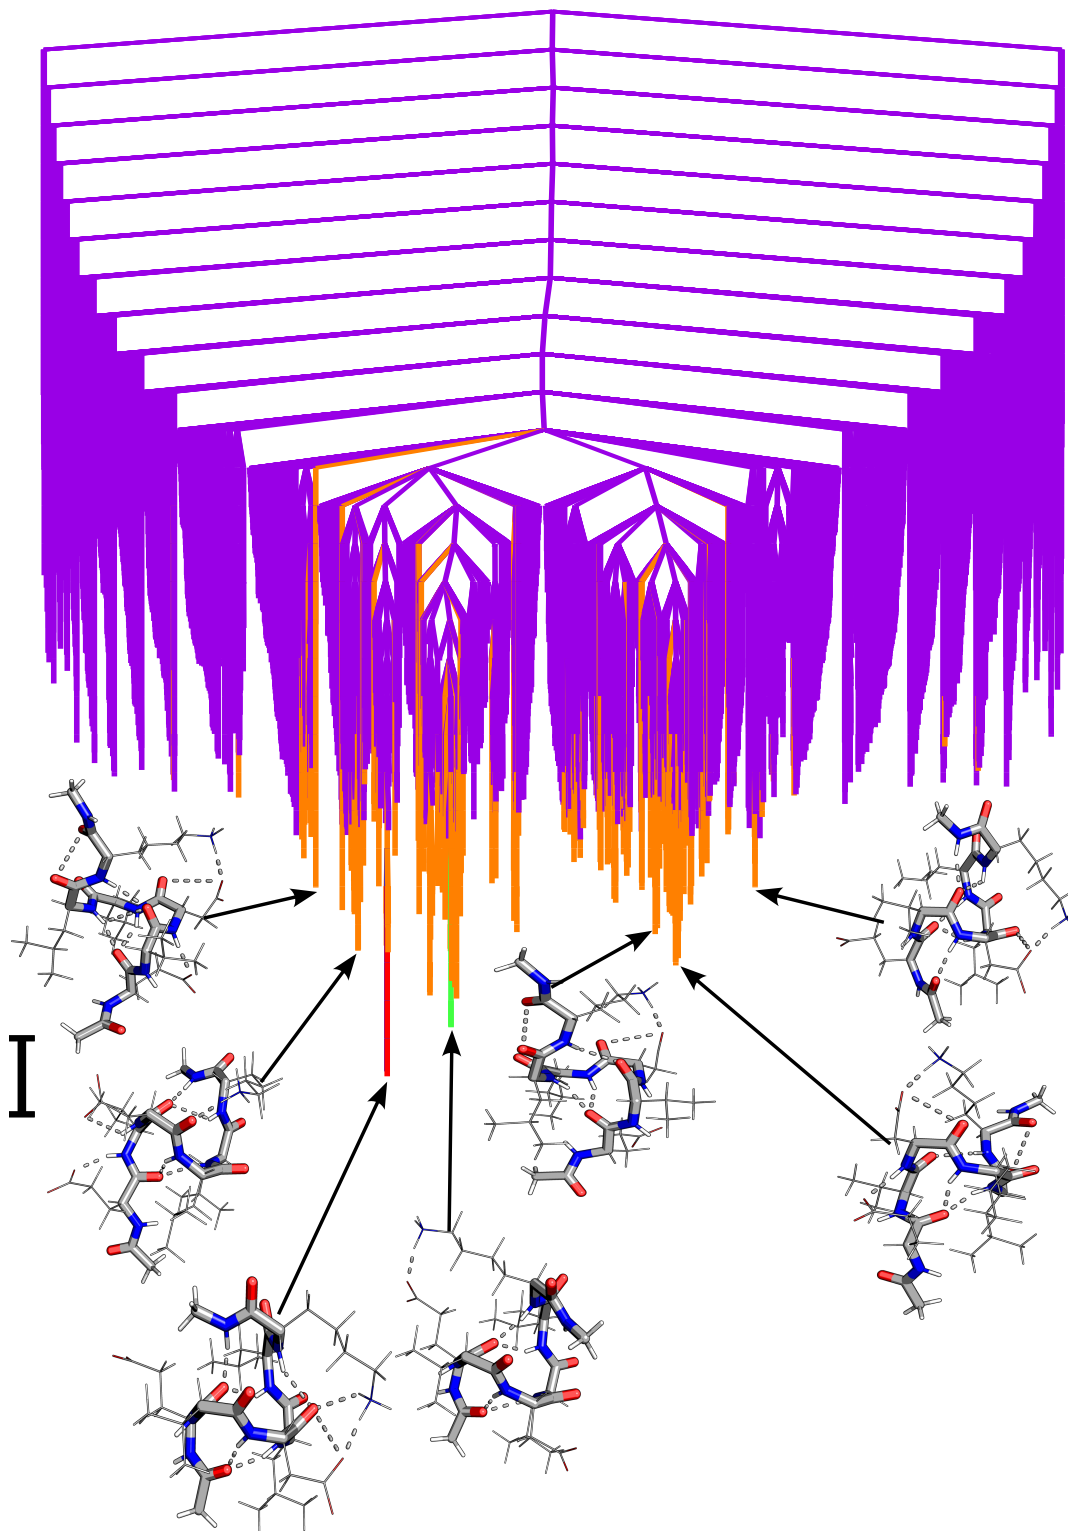

Figure S29: Disconnectivity graphs for EVDLLK monomer. Local minima representing transition for peaks/inflection points are represented by red to blue (peak 1), green to orange (peak 2), pink to purple (peak 3) and grey to yellow (peak 4). The scalebar represents  $1 \text{ kcal mol}^{-1}$ .

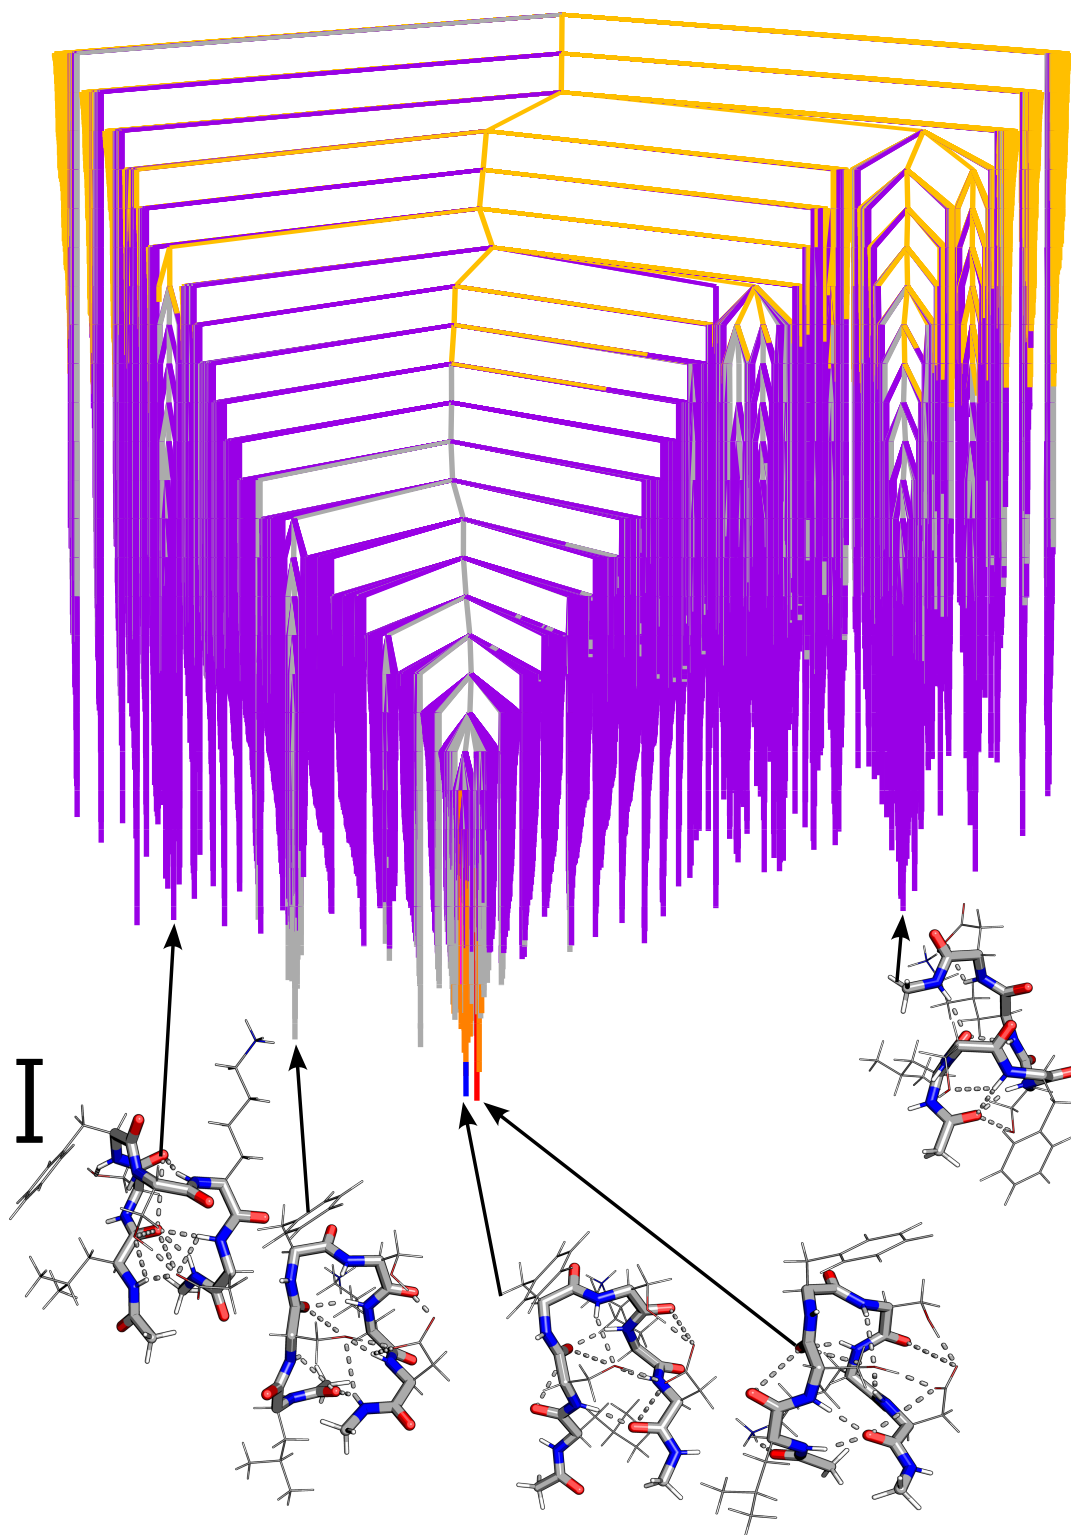

Figure S30: Disconnectivity graphs for LSFSKD monomer. Local minima representing transition for peaks/inflection points are represented by red to blue (peak 1), green to orange (peak 2), pink to purple (peak 3) and grey to yellow (peak 4). The scalebar represents  $1 \text{ kcal mol}^{-1}$ .

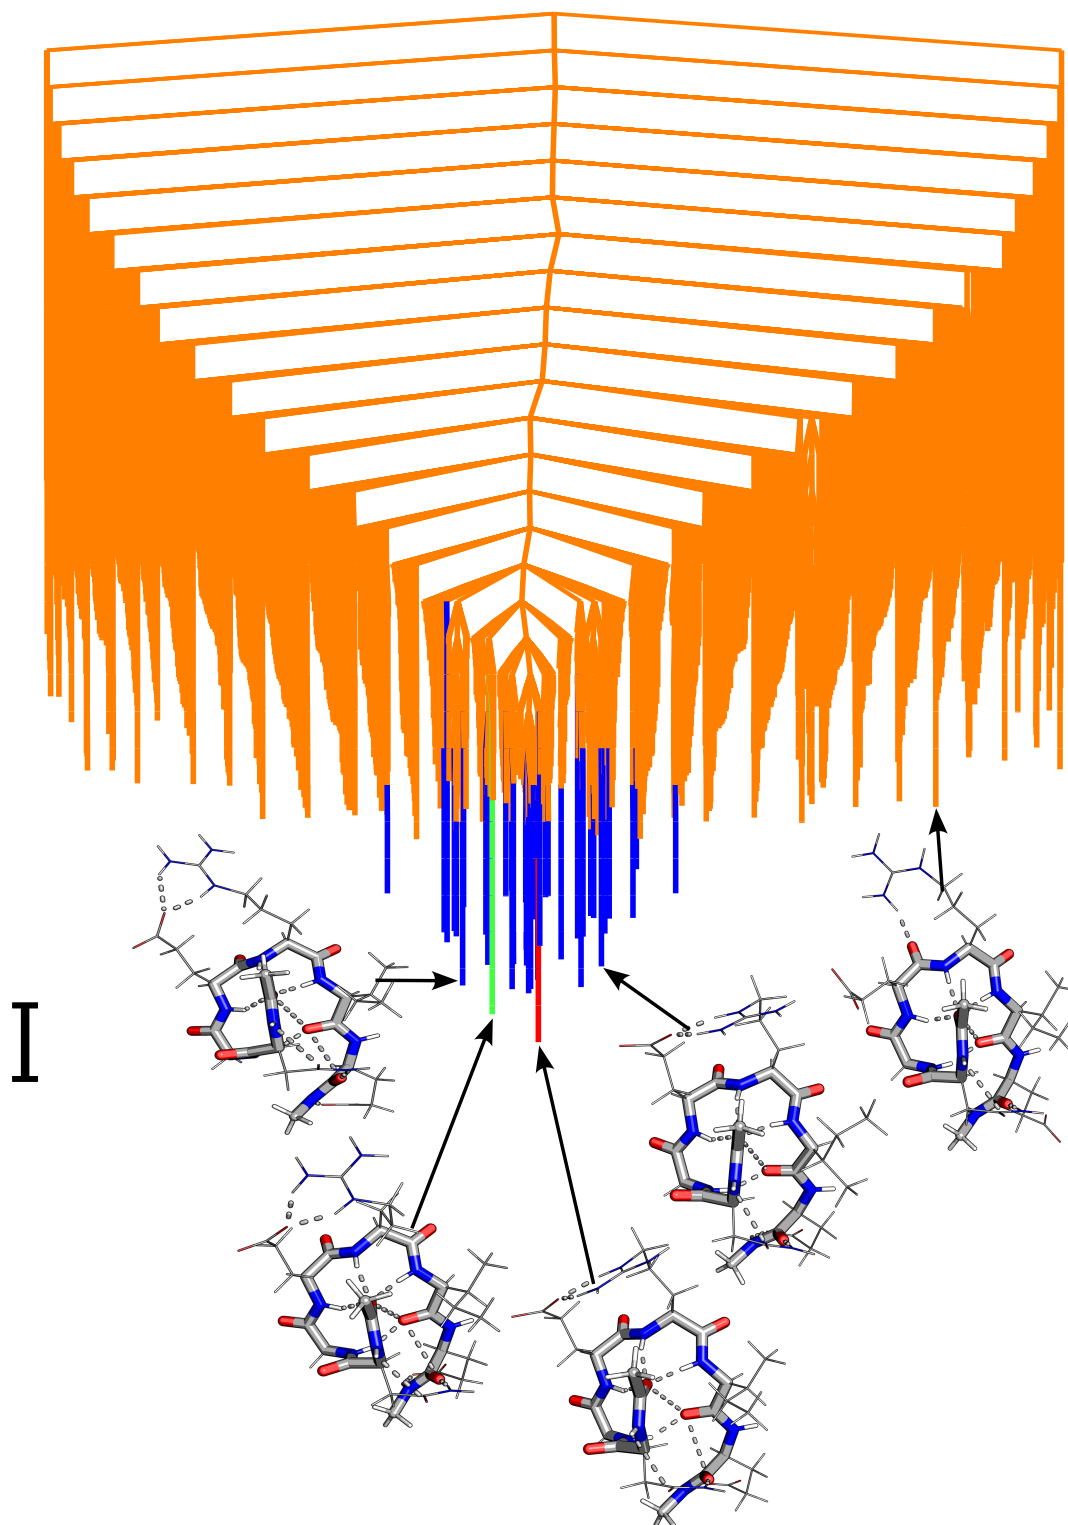

Figure S31: Disconnectivity graphs for NGERIE monomer. Local minima representing transition for peaks/inflection points are represented by red to blue (peak 1), green to orange (peak 2), pink to purple (peak 3) and grey to yellow (peak 4). The scalebar represents  $1 \text{ kcal mol}^{-1}$ .
